# Supplementary material
Source: publisher figshare collection journal article supplement (https://acs.figshare.com/ndownloader/files/4412332)

## Synthesis and Biological Evaluation of (±)-Dinemasone C and Analogues

**Amie M. Stewart,<sup>†</sup> Kathrin Meier,<sup>‡</sup> Barbara Schulz,<sup>‡</sup> Michael Steinert,<sup>‡</sup> and Barry B. Snider\*<sup>†</sup>**

<sup>†</sup>Department of Chemistry MS 015, Brandeis University, Waltham, Massachusetts 02454-9110

<sup>‡</sup>Institute of Microbiology, University of Braunschweig,  
Spielmannstr. 7, 38106 Braunschweig, Germany

|                                                                    |        |
|--------------------------------------------------------------------|--------|
| Experimental Procedures .....                                      | S2-6   |
| Table S1. Comparison of the Spectral Data of Natural and Synthetic |        |
| Dinemasone C Diacetate ( <b>27</b> ) .....                         | S7     |
| Copies of <sup>1</sup> H and <sup>13</sup> C NMR Spectra.....      | S8-S20 |

**General Procedure.** Reactions were conducted in flame- or oven-dried glassware under a nitrogen atmosphere and were stirred magnetically. The phrase "concentrated" refers to removal of solvents by means of a rotary evaporator attached to a diaphragm pump (15-60 Torr) followed by removal of residual solvents at < 1 Torr with a vacuum pump. Flash chromatography was performed on silica gel 60 (230-400 mesh). Analytical thin layer chromatography (TLC) was performed using silica gel 60 F-254 pre-coated glass plates (0.25 mm). TLC Plates were analyzed by short wave UV illumination, or by dipping in vanillin stain (27 g of vanillin in 380 mL of EtOH, 50 mL of water and 20 mL of concentrated sulfuric acid) and heating on a hot plate or by spray with permanganate spray (5 g of KMnO<sub>4</sub> in 495 mL of water). THF was dried and purified by distillation from sodium/benzophenone. DIPEA and benzene were distilled from CaH<sub>2</sub>. <sup>1</sup>H and <sup>13</sup>C NMR spectra were obtained on a 400 MHz spectrometer in CDCl<sub>3</sub> with tetramethylsilane as internal standard unless otherwise indicated. Chemical shifts are reported in δ (ppm downfield from tetramethylsilane). Coupling constants are reported in Hz with multiplicities denoted as s (singlet), d (doublet), t (triplet), q (quartet), p (pentet), m (multiplet) and br (broad). COSY spectra were recorded for all compounds and used to assign <sup>1</sup>H NMR spectra. IR spectra were acquired on an FT-IR spectrometer and are reported in wave numbers (cm<sup>-1</sup>). High resolution mass spectra were obtained using the following ionization techniques: chemical ionization (CI), electron impact (EI), electrospray ionization analyzed by quadrupole time of flight (QTOF).

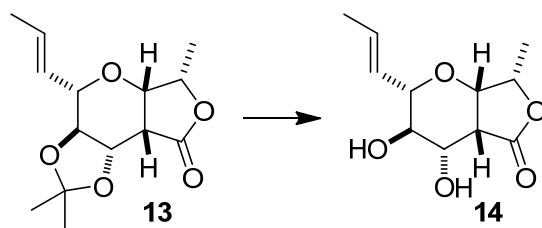

**(2*S*,3*R*,4*S*,4*aR*,7*S*,7*aS*)-*rel*-Hexahydro-3,4-dihydroxy-7-methyl-2-(1*E*)-1-propen-1-yl-5*H*-furo[3,4-*b*]pyran-5-one (*nor*-Dinemasone B, **14**).** A solution of acetoneide (**13**)<sup>5b</sup> (14 mg, 0.052 mmol) in 4:1 AcOH/H<sub>2</sub>O (2.5 mL) was stirred at 25 °C for 3 h and concentrated with heating. Flash chromatography of the residue on silica gel (3% MeOH in CH<sub>2</sub>Cl<sub>2</sub>) yielded 10 mg

(84%) of *nor*-dinemasone B (**14**) as a white solid: mp 161-163 °C;  $^1\text{H}$  NMR 5.85 (dq, 1,  $J = 15.6$ , 6.8), 5.53 (ddd,  $J = 15.6$ , 6.8, 1.8), 4.57 (dq, 1,  $J = 2.8$ , 6.8), 4.25 (d, 1  $J = 10.4$ , OH), 4.20 (dd, 1,  $J = 3.4$ , 2.8), 3.88 (ddd, 1,  $J = 10.4$ , 9.2, 6.8), 3.55 (dd, 1,  $J = 9.2$ , 6.8), 3.29 (dd, 1,  $J = 9.2$ , 9.2), 3.15 (dd, 1,  $J = 6.8$ , 3.4), 2.54 (br s, 1, OH), 1.77 (dd, 3,  $J = 6.8$ , 1.8), 1.47 (d, 3,  $J = 6.8$ );  $^{13}\text{C}$  NMR 176.8, 130.9, 127.0, 79.7, 78.7, 75.4, 73.7, 71.6, 46.3, 18.0, 13.4; IR (neat) 3297, 2909, 1753, 1638, 1092, 1053, 952; HRMS (QTOF  $\text{ESI}^+$ ) calcd for  $\text{C}_{11}\text{H}_{16}\text{O}_5\text{Na}$  ( $\text{MNa}^+$ ) 251.0895, found 251.0899.

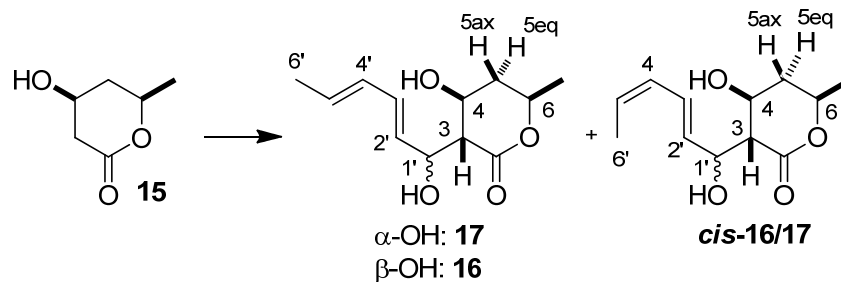

**(3*S*,4*S*,6*R*)-*rel*-Tetrahydro-4-hydroxy-6-methyl-3-[(1*R*,2*E*,4*E*)-1-hydroxy-2,4-hexadien-1-yl]-2*H*-pyran-2-one (**17**) and (3*S*,4*S*,6*R*)-*rel*-Tetrahydro-4-hydroxy-6-methyl-3-[(1*S*,2*E*,4*E*)-1-hydroxy-2,4-hexadien-1-yl]-2*H*-pyran-2-one (**16**).** Lithium diisopropylamide was prepared from diisopropylamine (2.4 mL, 17.3 mmol) and *n*-BuLi (13.3 mL, 1.3 M in hexanes, 17.3 mmol) in THF (30 mL) at 0 °C. The solution was cooled to -78 °C. A solution of **15** (898 mg, 6.90 mmol) in THF (10 mL) was added over 5 min. The mixture was stirred for 45 min and treated with a 4:1 mixture of (2*E*,4*E*)- and (2*E*,4*Z*)-2,4-hexadienal (0.92 mL, 8.34 mmol). The mixture was stirred for 3 h at -78 °C and treated with 10% aqueous HCl solution (40 mL). After separation of the layers, the aqueous layer was extracted with ether (3 × 30 mL). The combined organic layers were washed with brine, dried over  $\text{MgSO}_4$ , and concentrated. Flash chromatography of the residue on silica gel (2:1 hexanes/EtOAc) yielded 694 mg (44%) of a 2:1 mixture of **17** and **16**, plus trace amounts of the 2*E*,4*Z* isomers (***cis*-16/17**). Flash chromatography of a different batch on silica gel (4:1 hexanes/EtOAc) yielded 536 mg (34%) of a 4:3 mixture **17** and **16** followed by 158 mg (10%) of pure **17** as a colorless gum.

Data for **17**:  $^1\text{H}$  NMR 6.36 (dd, 1,  $J = 15.2, 10.8$ , H-3'), 6.06 (ddq, 1,  $J = 14.8, 10.8, 1.6$ , H-4'), 5.77 (dq, 1,  $J = 14.8, 6.8$ , H-5'), 5.69 (dd, 1,  $J = 15.2, 6.4$ , H-2'), 4.85-4.80 (m, 1, H-1'), 4.37 (ddq, 1,  $J = 12.0, 2.2, 6.4$ , H-6), 4.15-4.08 (m, 1, H-4), 3.04 (d, 1,  $J = 7.2$ , OH), 2.68 (dd, 1,  $J = 9.2, 3.4$ , H-3), 2.19 (ddd, 1,  $J = 12.0, 4.4, 2.2$ , H-5eq), 2.07 (d, 1,  $J = 4.0$ , OH), 1.77 (d, 3,  $J = 6.8$ , H-6'), 1.68 (ddd, 1,  $J = 12.0, 12.0, 12.0$ , H-5ax), 1.40 (d, 3,  $J = 6.4$ , H-6-Me);  $^{13}\text{C}$  NMR 172.8, 132.6, 131.3, 130.2, 129.1, 73.7, 71.0, 64.7, 55.6, 39.1, 21.4, 18.1; IR (neat) 3410, 2979, 2932, 1707, 1390, 1257, 1087, 991; HRMS (QTOF ESI $^+$ ) calcd for  $\text{C}_{12}\text{H}_{18}\text{O}_4\text{Na}$  ( $\text{MNa}^+$ ) 249.1103, found 249.1102.

Partial data for **16** were determined from the mixture:  $^1\text{H}$  NMR 5.11-5.07 (m, 1, H-1'), 4.25-4.18 (m, 1, H-4), 3.44 (d, 1,  $J = 1.2$ , OH), 2.85 (dd, 1,  $J = 9.2, 5.2$ , H-3), 2.55 (d, 1,  $J = 3.4$ , OH), 1.67 (ddd, 1,  $J = 12.0, 12.0, 12.0$ , H-5ax), 1.39 (d, 3,  $J = 6.4$ , H-6-Me). Other peaks overlapped with the major isomer **17**.

Partial data for *cis*-**16/17** were determined from the mixture: 6.71 (dd, 1,  $J = 15.6, 10.8$ ).

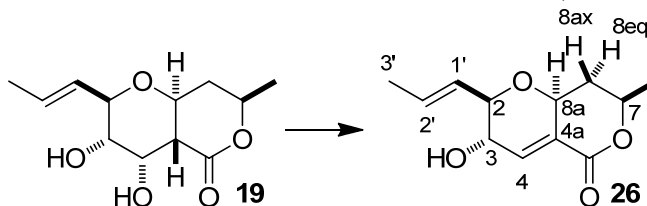

(2*R*,3*S*,7*R*,8*aS*)-*rel*-3,7,8,8*a*-Tetrahydro-3-hydroxy-7-methyl-2-(1*E*)-1-propen-1-yl-2*H*,5*H*-pyrano[4,3-*b*]pyran-5-one (**26**). Pyridine (0.54 mL, 6.7 mmol) and acetic anhydride (0.32 mL, 3.4 mmol) were added to a solution of diol **19** (33 mg, 0.13 mmol) and DMAP (8 mg, 0.07 mmol) in  $\text{CH}_2\text{Cl}_2$  (2 mL). The solution was stirred for 18 h at 25 °C under nitrogen, diluted with  $\text{CH}_2\text{Cl}_2$  (8 mL), and washed with 2 M HCl (1  $\times$  10 mL). After separation of the layers, the aqueous layer was extracted with  $\text{CH}_2\text{Cl}_2$  (2  $\times$  10 mL). The combined organic layers were dried over  $\text{MgSO}_4$ , and concentrated to give crude **25**.

Crude **25** was dissolved in MeOH (15 mL) and  $\text{K}_2\text{CO}_3$  (590 mg, 4.2 mmol) was added. The mixture was stirred for 24 h at 25 °C, treated with 2 M HCl (10 mL), and extracted with  $\text{CH}_2\text{Cl}_2$  (3  $\times$  20 mL). The combined organic layers were dried over  $\text{MgSO}_4$  and concentrated. Flash

chromatography of the residue on MeOH-deactivated silica gel (3:1 hexanes/EtOAc) yielded 15 mg (49%) of **26** as a colorless gum:  $^1\text{H}$  NMR 7.06 (br s, 1,  $w_{1/2} = 8$ , H-4), 5.96 (dq, 1,  $J = 15.6$ , 6.4, H-2'), 5.56 (dd, 1,  $J = 15.6$ , 7.2, H-1'), 4.50 (ddq, 1,  $J = 12.4$ , 2.3, 6.0, H-7), 4.44 (br d,  $J = 12.4$ , H-8a), 4.21-4.16 (m, 1, H-3), 3.81 (dd, 1,  $J = 7.6$ , 7.2, H-2), 2.26 (br d, 1,  $J = 12.4$ , H-8eq), 1.90 (d, 1,  $J = 6.0$ , OH), 1.79 (d, 3,  $J = 6.4$ , H-3'-Me), 1.70 (ddd, 1,  $J = 12.4$ , 12.4, 12.4, H-8ax), 1.44 (d, 3,  $J = 6.0$ , H-7-Me);  $^{13}\text{C}$  NMR 163.5, 139.5, 132.2, 130.4, 127.7, 79.7, 73.2, 71.2, 67.8, 37.1, 21.8, 18.1; IR (neat) 3414, 2980, 2935, 2858, 1714, 1652, 1247, 1109, 1048; MS (70 eV):  $m/z$  (%) = 154 (45), 139 (2), 125 (10), 113 (15), 112 (100); HRMS (QTOF ESI $^+$ ) calcd for  $\text{C}_{12}\text{H}_{16}\text{O}_4\text{Na}$  ( $\text{MNa}^+$ ) 247.0946, found 247.0948.

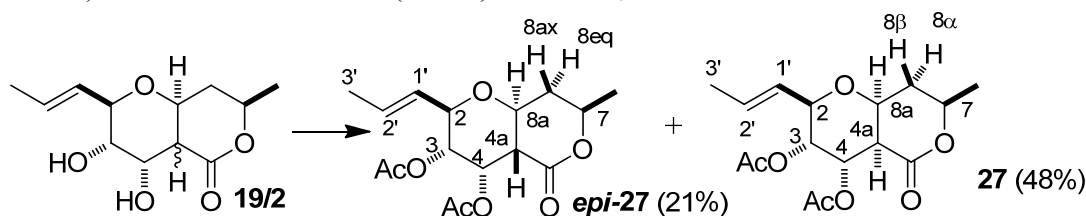

**(2R,3R,4S,4aR,7R,8aS)-rel-3,4-bis(Acetyl)hexahydro-7-methyl-2-(1E)-1-propen-1-yl-2H,5H-pyrano[4,3-b]pyran-5-one (27)**. Acetic anhydride (8.9  $\mu\text{L}$ , 0.094 mmol) and TMSOTf (1.0  $\mu\text{L}$ , 0.0055 mmol) were added to a solution of a 2:1 mixture of **2** and **19** (7.6 mg, 0.031 mmol) in  $\text{CH}_2\text{Cl}_2$  (0.5 mL) and the solution was stirred at 25  $^\circ\text{C}$  under nitrogen for 2 h. The reaction was treated with MeOH (0.1 mL), diluted with  $\text{CH}_2\text{Cl}_2$  (5 mL), washed with water (5 mL), dried over  $\text{MgSO}_4$  and concentrated. Flash chromatography of the residue on MeOH-deactivated silica gel (20% EtOAc in toluene) yielded 2.1 mg (21%) of **epi-27** followed by 4.9 mg (48%) of **27** as a colorless gum.

Data for **epi-27**:  $^1\text{H}$  NMR 5.97 (dd, 1,  $J = 2.6$ , 2.3, H-4), 5.85 (dq, 1,  $J = 15.2$ , 6.4, H-2'), 5.37 (ddq,  $J = 15.2$ , 6.0, 2.0, H-1'), 4.74 (dd, 1,  $J = 10.0$ , 2.6, H-3), 4.52-4.44 (m, 1, H-7), 4.11-4.03 (m, 2, H-8a and H-2), 2.48 (dd, 1,  $J = 11.2$ , 2.3, H-4a), 2.33 (ddd, 1,  $J = 12.8$ , 3.5, 3.5, H-8eq), 2.09 (s, 3), 1.98 (s, 3), 1.78-1.68 (m, 1, H-8ax), 1.72 (dd, 3,  $J = 6.4$ , 2.0, H-3'-Me), 1.44 (d, 3,  $J = 6.0$ , H-7-Me).

Data for **27**: 5.81 (dd, 1,  $J = 3.5, 3.0$ , H-4), 5.80 (dq, 1,  $J = 15.2, 6.8$ , H-2'), 5.36 (ddq,  $J = 15.2, 8.2, 1.5$ , H-1'), 5.09 (dd, 1,  $J = 9.8, 3.0$ , H-3), 4.43 (ddd,  $J = 9.0, 3.5, 3.3$ , H-8a), 4.32-4.24 (m, 1, H-7), 4.06 (dd,  $J = 9.8, 8.2$ , H-2), 2.86 (dd, 1,  $J = 3.5, 3.5$ , H-4a), 2.42 (ddd, 1,  $J = 15.2, 9.0, 3.5$ , H-8 $\alpha$ ), 2.15 (s, 3), 1.98 (s, 3), 1.73 (ddd, 1,  $J = 15.2, 12.0, 3.3$ , H-8 $\beta$ ), 1.69 (dd, 3,  $J = 6.8, 1.5$ , H-3'-Me), 1.39 (d, 3,  $J = 6.0$ , H-7-Me);  $^{13}\text{C}$  NMR 169.6, 169.2, 169.1, 131.8, 127.3, 76.0, 72.2, 67.8, 67.7, 66.9, 44.5, 36.7, 21.0, 20.7, 20.5, 17.9; IR (neat) 1750, 1373, 1244, 1222, 1056; MS (70 eV):  $m/z$  (%) = 283 (5), 267 (3), 223 (85), 154 (100), 113 (90), 112 (95); HRMS (QTOF ESI $^{+}$ ) calcd for  $\text{C}_{16}\text{H}_{22}\text{O}_7\text{Na}$  ( $\text{MNa}^{+}$ ) 349.1263, found 349.1271; HRMS (QTOF MS ESI $^{+}$ ) calcd for  $\text{C}_{16}\text{H}_{23}\text{O}_7$  ( $\text{MH}^{+}$ ) 327.1444, found 327.1438. The  $^1\text{H}$  and  $^{13}\text{C}$  spectral data are identical to those reported by Krohn<sup>1</sup> as tabulated in Table S1 on page S9.

**Tests for Biological Activity.** For the agar diffusion assay,<sup>14</sup> the compounds were dissolved in acetone at a concentration of 1, 2 or 4  $\mu\text{g}/\mu\text{L}$ . Fifty  $\mu\text{L}$  of the solution was transferred by pipette onto a sterile filter disc (0.05, 0.1 or 0.2 mg/filter disc), which was placed onto an appropriate agar growth medium for the respective test organisms (for *Escherichia coli*, *Bacillus megaterium*, *Microbotryum violaceum*, and *Chlorella fusca* see Schulz et al.,<sup>14</sup> and on YEB medium (10 g of *N*-(2-acetamido)-2-aminoethanesulfonic acid, 10 g of yeast extract, 0.4 g of cysteine, and 0.25 g of ferric pyrophosphate in 1000 mL of distilled water) for *Legionella pneumophila* Corby), and subsequently sprayed with a suspension of the respective test organism. The radii of the zones of inhibition in mm are reported in Table 1 and 2 for compounds **14**, **17**, **19**, **2**, and **26**, in Table 1 for the control substances penicillin, tetracycline, nystatin, actidione, and acetone, and in Table 2 for the control substance kanamycin.

**Table S1.** Comparison of the Spectral Data of Natural and Synthetic Dinemasone C Diacetate (**27**)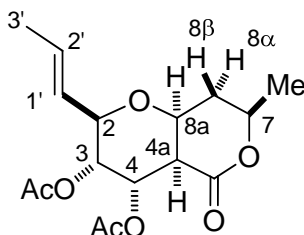

| Atom #  | Natural Dinemasone C Diacetate ( <b>27</b> ) |                |                                                                      | Synthetic Dinemasone C Diacetate ( <b>27</b> ) |                |                                                                       |
|---------|----------------------------------------------|----------------|----------------------------------------------------------------------|------------------------------------------------|----------------|-----------------------------------------------------------------------|
|         | <sup>13</sup> C                              | <sup>1</sup> H |                                                                      | <sup>13</sup> C                                | <sup>1</sup> H |                                                                       |
| 2       | 76.0                                         | 4.08           | (dd, $J_{2,3} = 10.0$ , $J_{2,1'} = 7.7$ )                           | 76.0                                           | 4.06           | (dd, $J_{2,3} = 9.8$ , $J_{2,1'} = 8.2$ )                             |
| 3       | 67.8                                         | 5.11           | (dd, $J_{3,2} = 10.0$ , $J_{3,4} = 3.3$ )                            | 67.7                                           | 5.09           | (dd, $J_{3,2} = 9.8$ , $J_{3,4} = 3.0$ )                              |
| 3-OAc   | 20.7                                         | 1.99           | (s)                                                                  | 20.7                                           | 1.98           | (s)                                                                   |
|         | 169.2                                        | —              |                                                                      | 169.2                                          | —              |                                                                       |
| 4       | 67.0                                         | 5.83           | (dd, $J_{4,3} = J_{4,4a} = 3.3$ )                                    | 66.9                                           | 5.81           | (dd, $J_{4,4a} = 3.5$ , $J_{4,3} = 3.0$ )                             |
| 4-OAc   | 20.9                                         | 2.14           | (s)                                                                  | 21.0                                           | 2.15           | (s)                                                                   |
|         | 169.6                                        | —              |                                                                      | 169.6                                          | —              |                                                                       |
| 4a      | 44.6                                         | 2.88           | (dd, $J_{4a,4} = J_{4a,8a} = 3.3$ )                                  | 44.5                                           | 2.86           | (dd, $J_{4a,4} = 3.5$ ,<br>$J_{4a,8a} = 3.5$ )                        |
| 5       | 169.0                                        | —              |                                                                      | 169.1                                          | —              |                                                                       |
| 7       | 72.2                                         | 4.32           | (m)                                                                  | 72.2                                           | 4.32-4.24      | (m)                                                                   |
| 7-Me    | 20.5                                         | 1.41           | (d, $J_{7,7} = 6.2$ )                                                | 20.5                                           | 1.39           | (d, $J_{7-Me,7} = 6.0$ )                                              |
| 8α      | 36.7                                         | 2.44           | (ddd, $J_{gem} = 15.3$ ,<br>$J_{8,8a} = 9.3$ , $J_{8,7} = 3.6$ )     | 36.7                                           | 2.42           | (ddd, $J_{8α,8β} = 15.2$ ,<br>$J_{8α,8a} = 9.0$ , $J_{8α,7} = 3.5$ )  |
| 8β      | —                                            | 1.75           | (ddd, $J_{gem} = 15.3$ ,<br>$J_{8,7} = 12.0$ , $J_{8,8a} = 3.3$ )    | —                                              | 1.73           | (ddd, $J_{8β,8α} = 15.2$ ,<br>$J_{8β,7} = 12.0$ , $J_{8β,8a} = 3.3$ ) |
| 8a      | 67.9                                         | 4.44           | (ddd, $J_{8a,8} = 9.3$ ,<br>$J_{8a,8β} = 3.3$ , $J_{8a,4a} = 3.3$ )  | 67.8                                           | 4.43           | (ddd, $J_{8a,8α} = 9.0$ ,<br>$J_{8a,8β} = 3.3$ , $J_{8a,4a} = 3.5$ )  |
| 1'      | 127.4                                        | 5.38           | (ddq, $J_{1',2'} = 15.3$ ,<br>$J_{1',2} = 7.7$ , $J_{1',3'} = 1.7$ ) | 127.3                                          | 5.36           | (ddq, $J_{1',2'} = 15.2$ ,<br>$J_{1',2} = 8.2$ , $J_{1',3'} = 1.5$ )  |
| 2'      | 131.5                                        | 5.79           | (overlapped with H-4)                                                | 131.8                                          | 5.80           | (dq, 1, $J_{2',1'} = 15.2$ ,<br>$J_{2',3'} = 6.8$ )                   |
| 3' (Me) | 17.9                                         | 1.70           | (dd, $J_{3',2'} = 6.5$ , $J_{3',1'} = 1.7$ )                         | 17.9                                           | 1.69           | (dd, $J_{3',2'} = 6.8$ , $J_{3',1'} = 1.5$ )                          |

<sup>1</sup>H and <sup>13</sup>C NMR assignments were taken from reference 1.

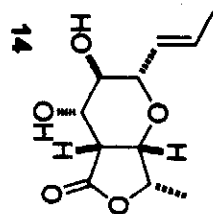

CDCl<sub>3</sub>  
400 MHz

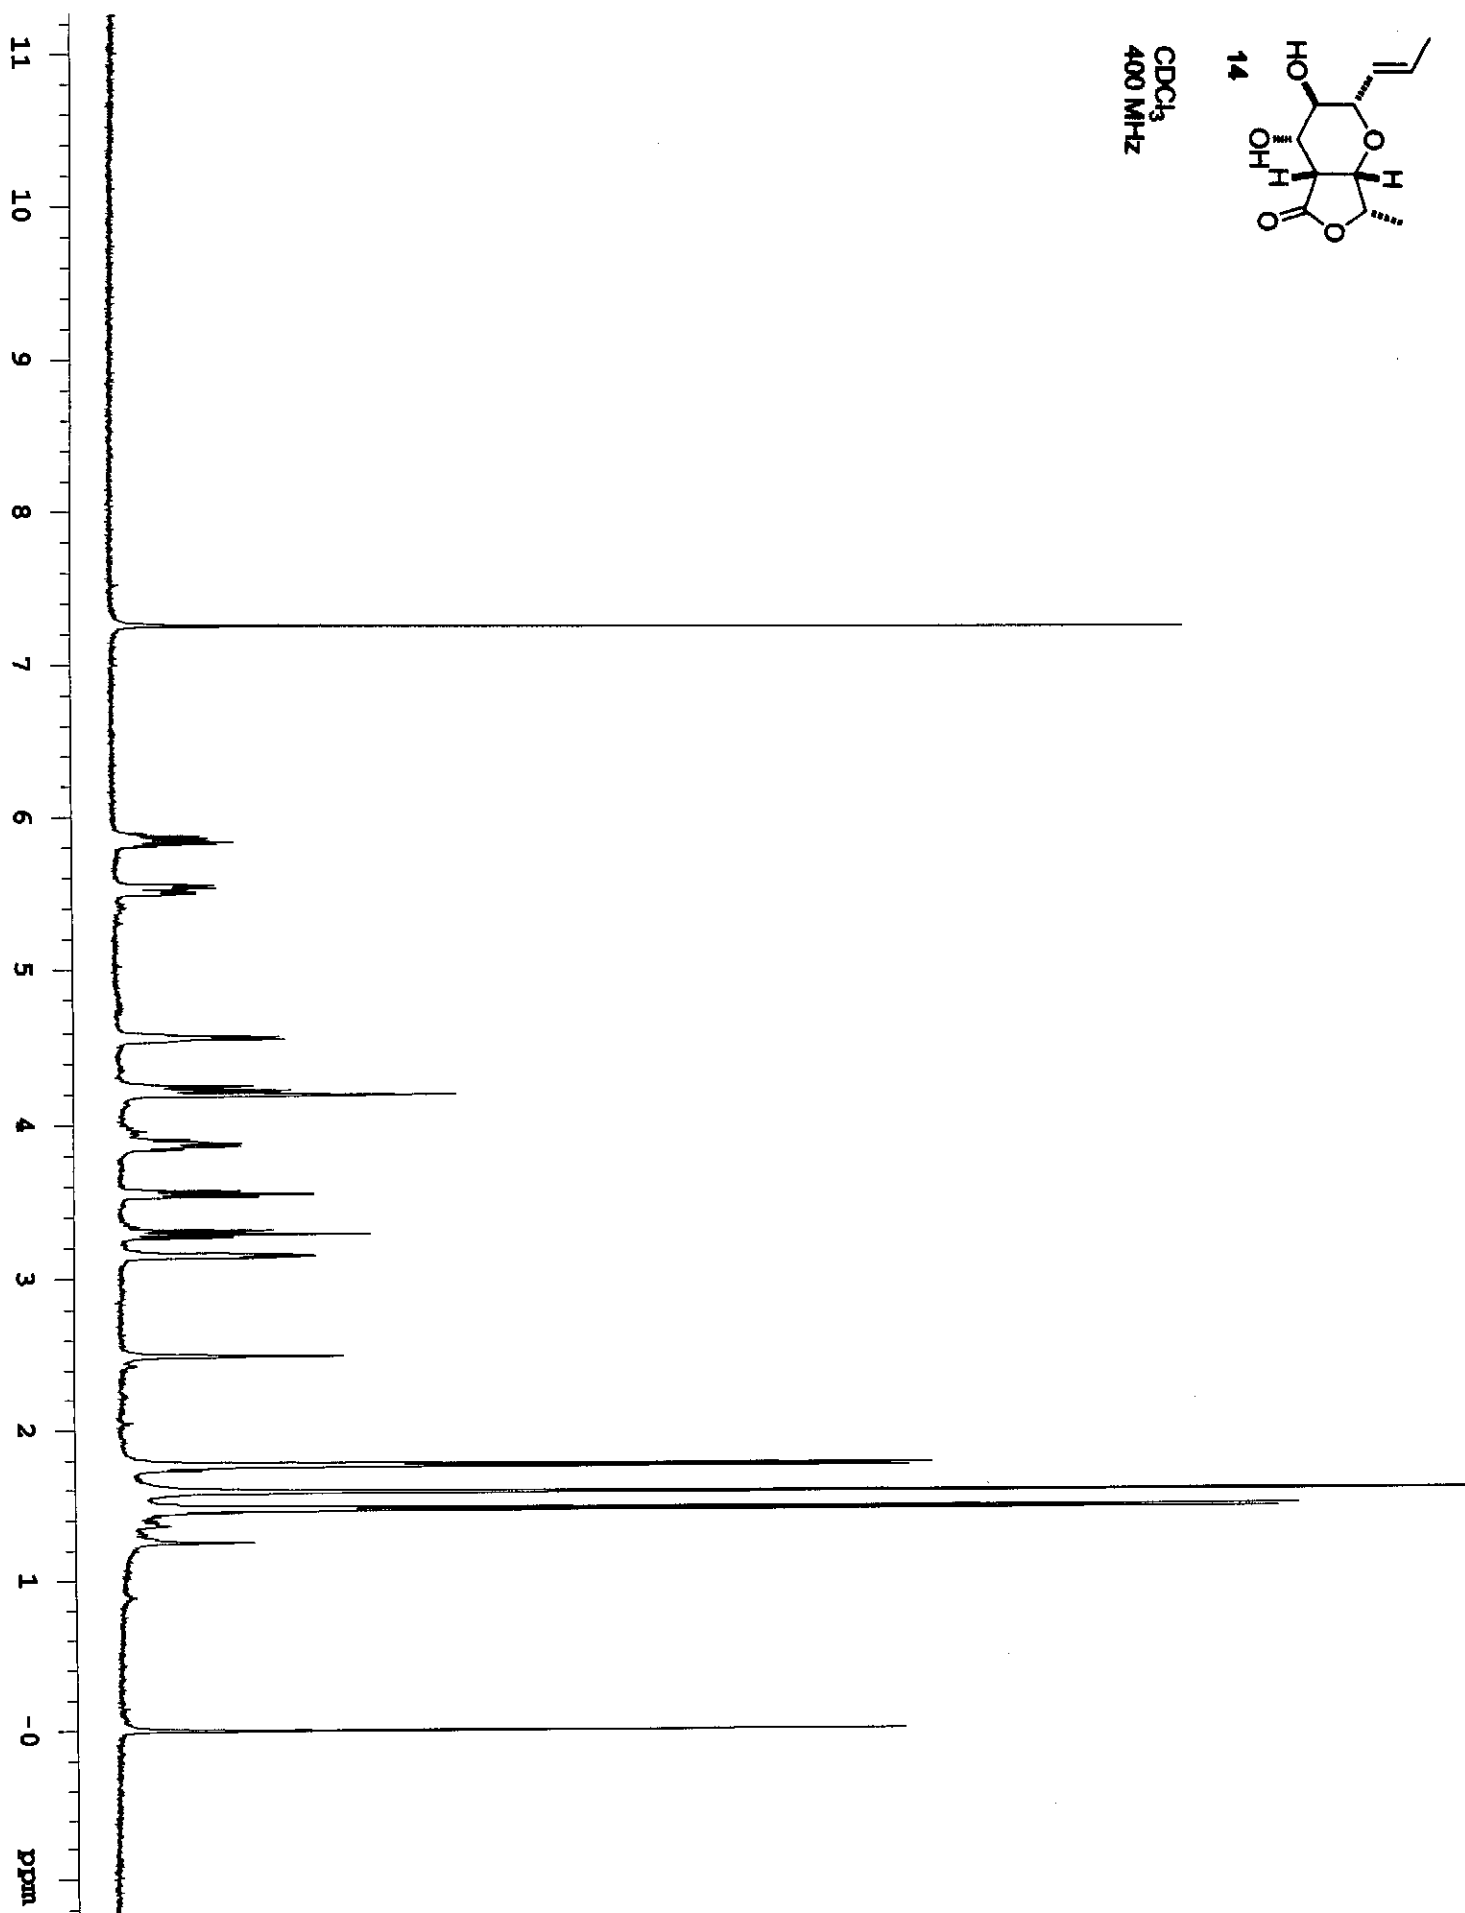



| INDEX | FREQUENCY | PPM     | HEIGHT |
|-------|-----------|---------|--------|
| 1     | 17775.005 | 176.820 | 23.3   |
| 2     | 13158.318 | 130.894 | 57.7   |
| 3     | 12763.866 | 126.971 | 40.8   |
| 4     | 8012.897  | 79.710  | 56.9   |
| 5     | 7909.897  | 78.685  | 83.0   |
| 6     | 7772.564  | 77.319  | 161.1  |
| 7     | 7740.519  | 77.000  | 166.7  |
| 8     | 7708.475  | 76.681  | 163.1  |
| 9     | 7581.823  | 75.421  | 86.6   |
| 10    | 7413.208  | 73.744  | 91.4   |
| 11    | 7201.105  | 71.634  | 93.9   |
| 12    | 4654.335  | 46.300  | 73.6   |
| 13    | 1812.299  | 18.028  | 70.6   |
| 14    | 1347.654  | 13.406  | 70.7   |

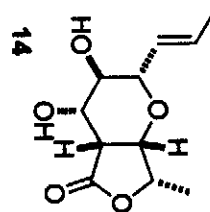

CDCl<sub>3</sub>  
100 MHz

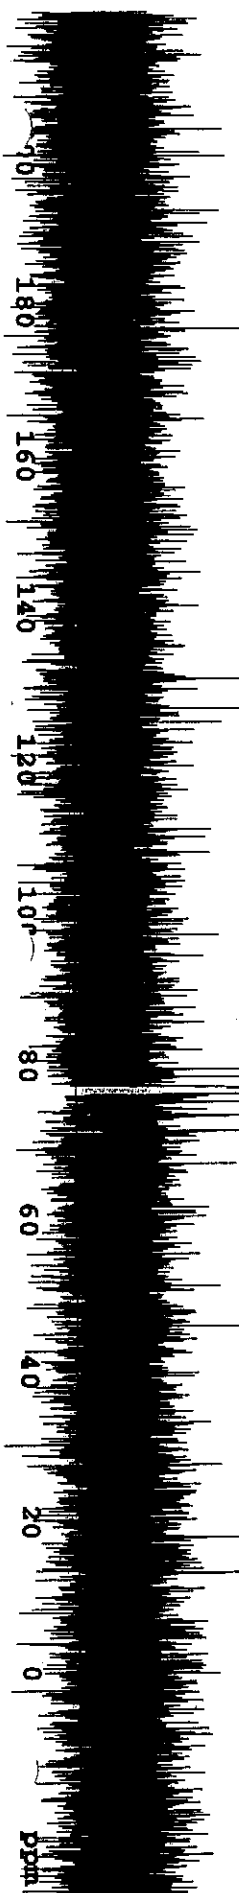

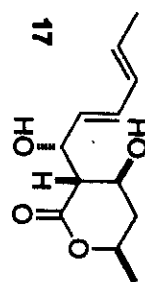

CDCl<sub>3</sub>  
400 MHz

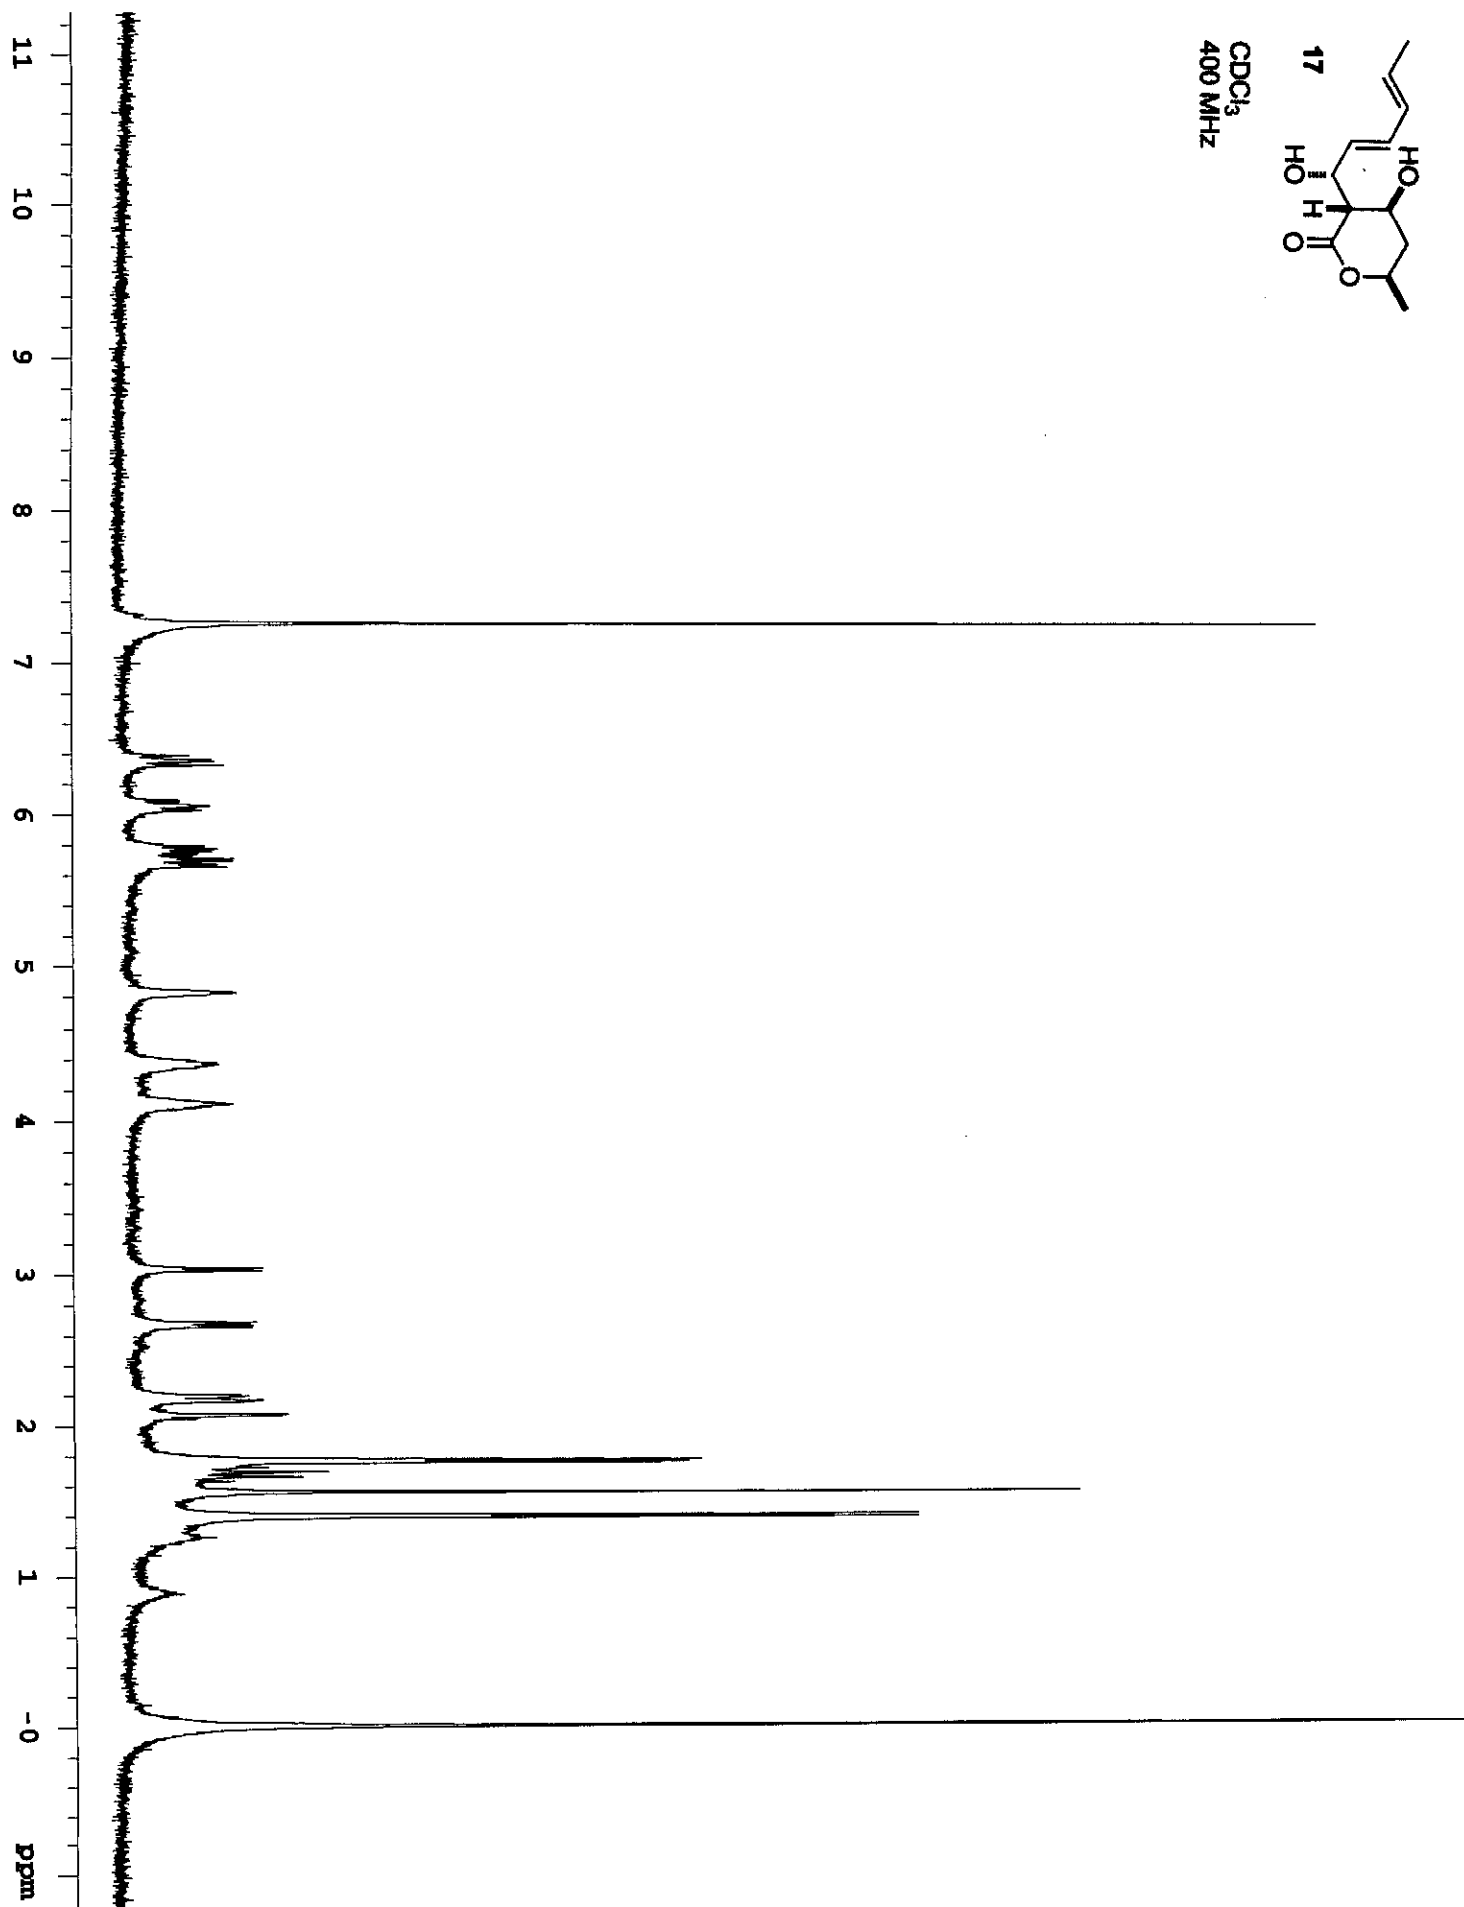

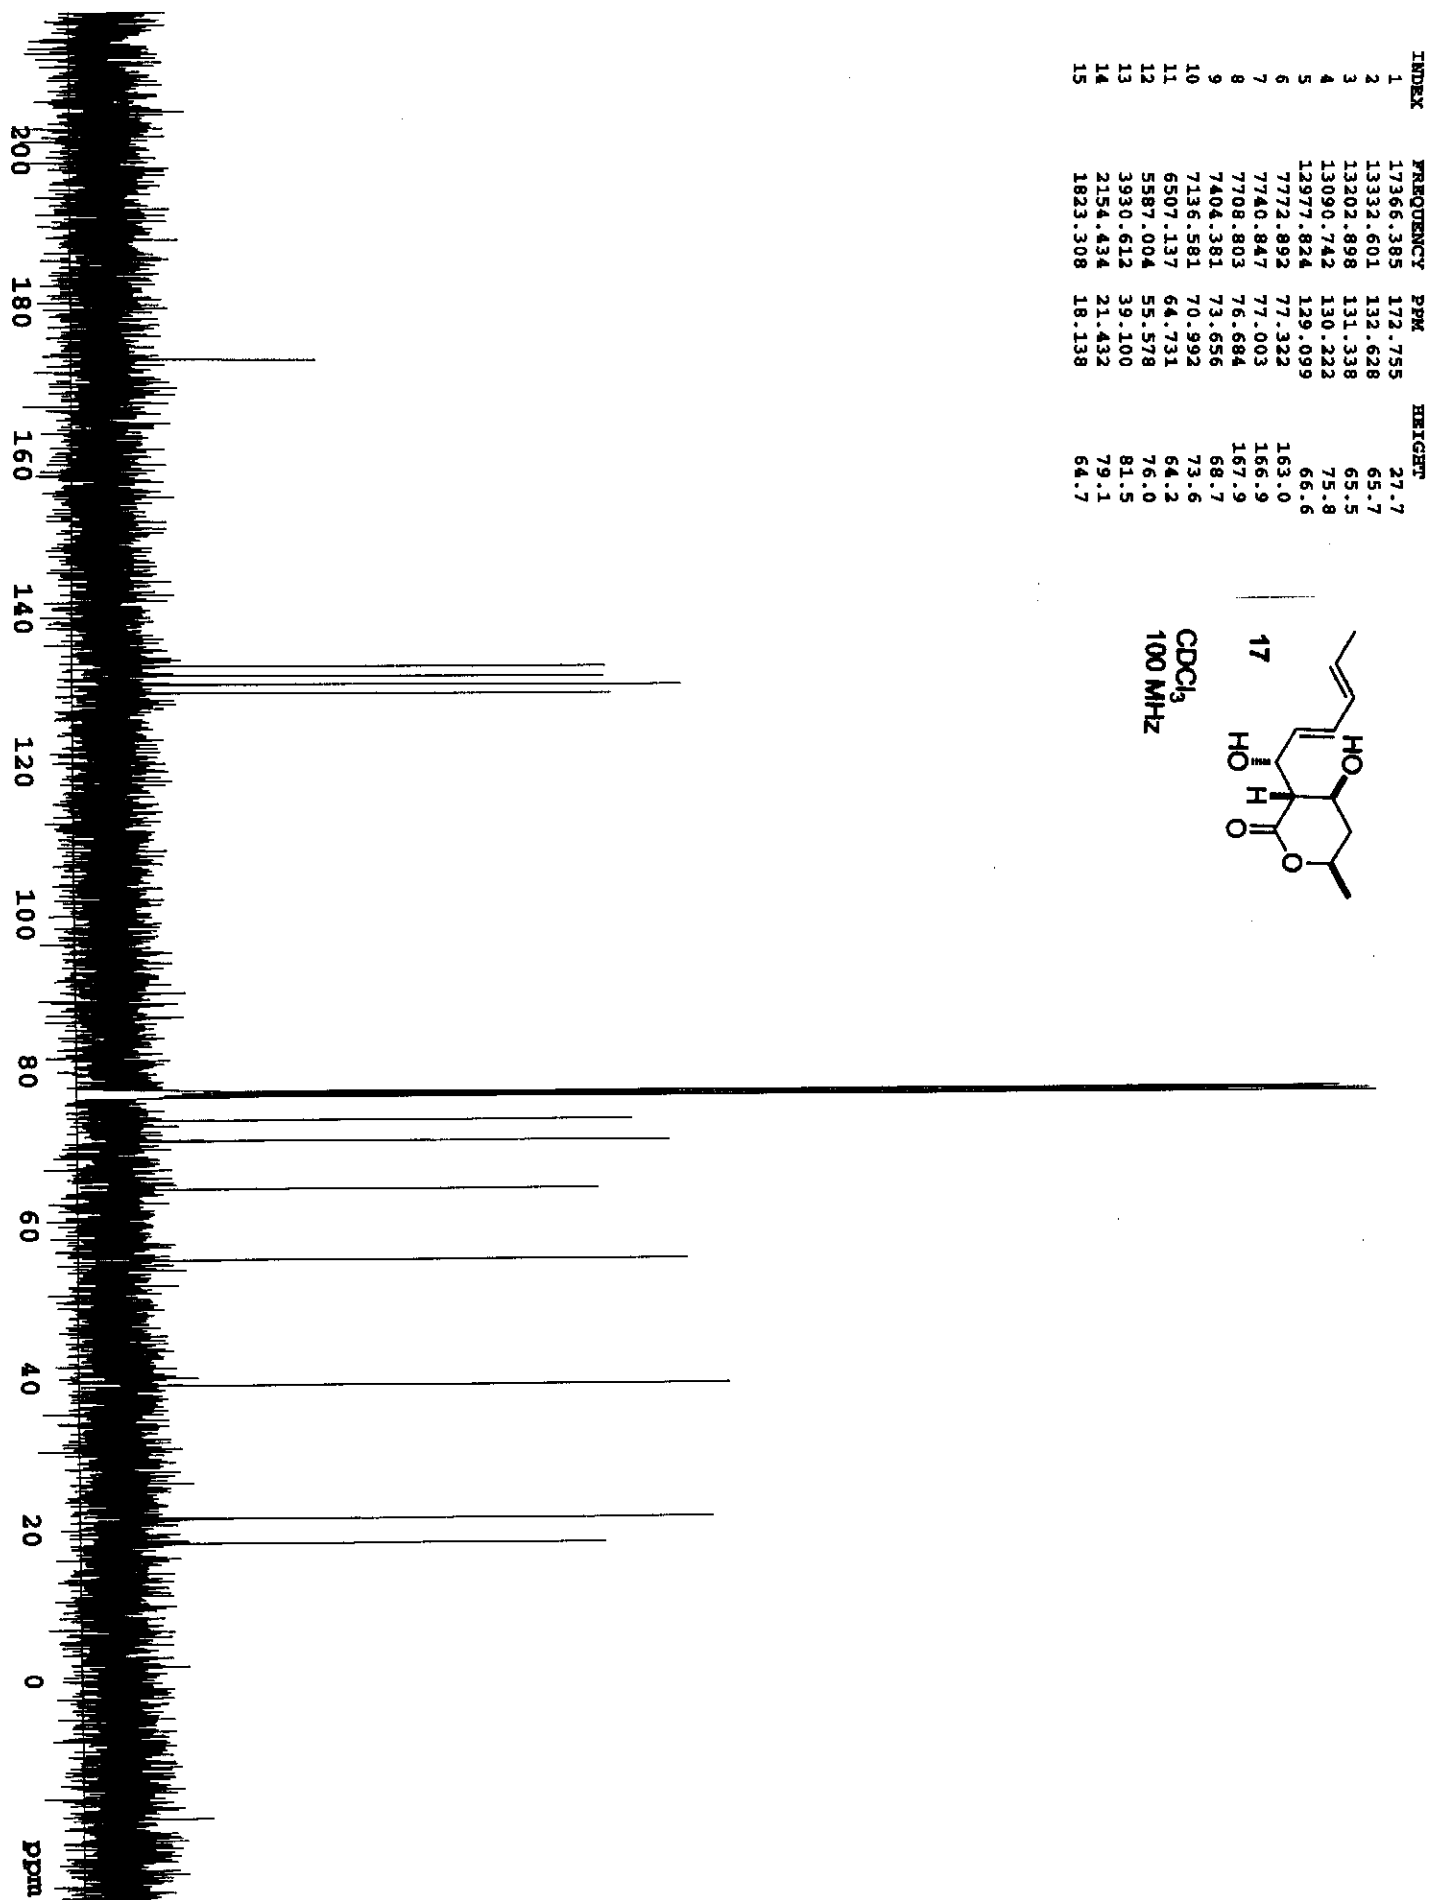

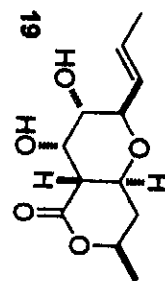

$\text{CDCl}_3$   
400 MHz

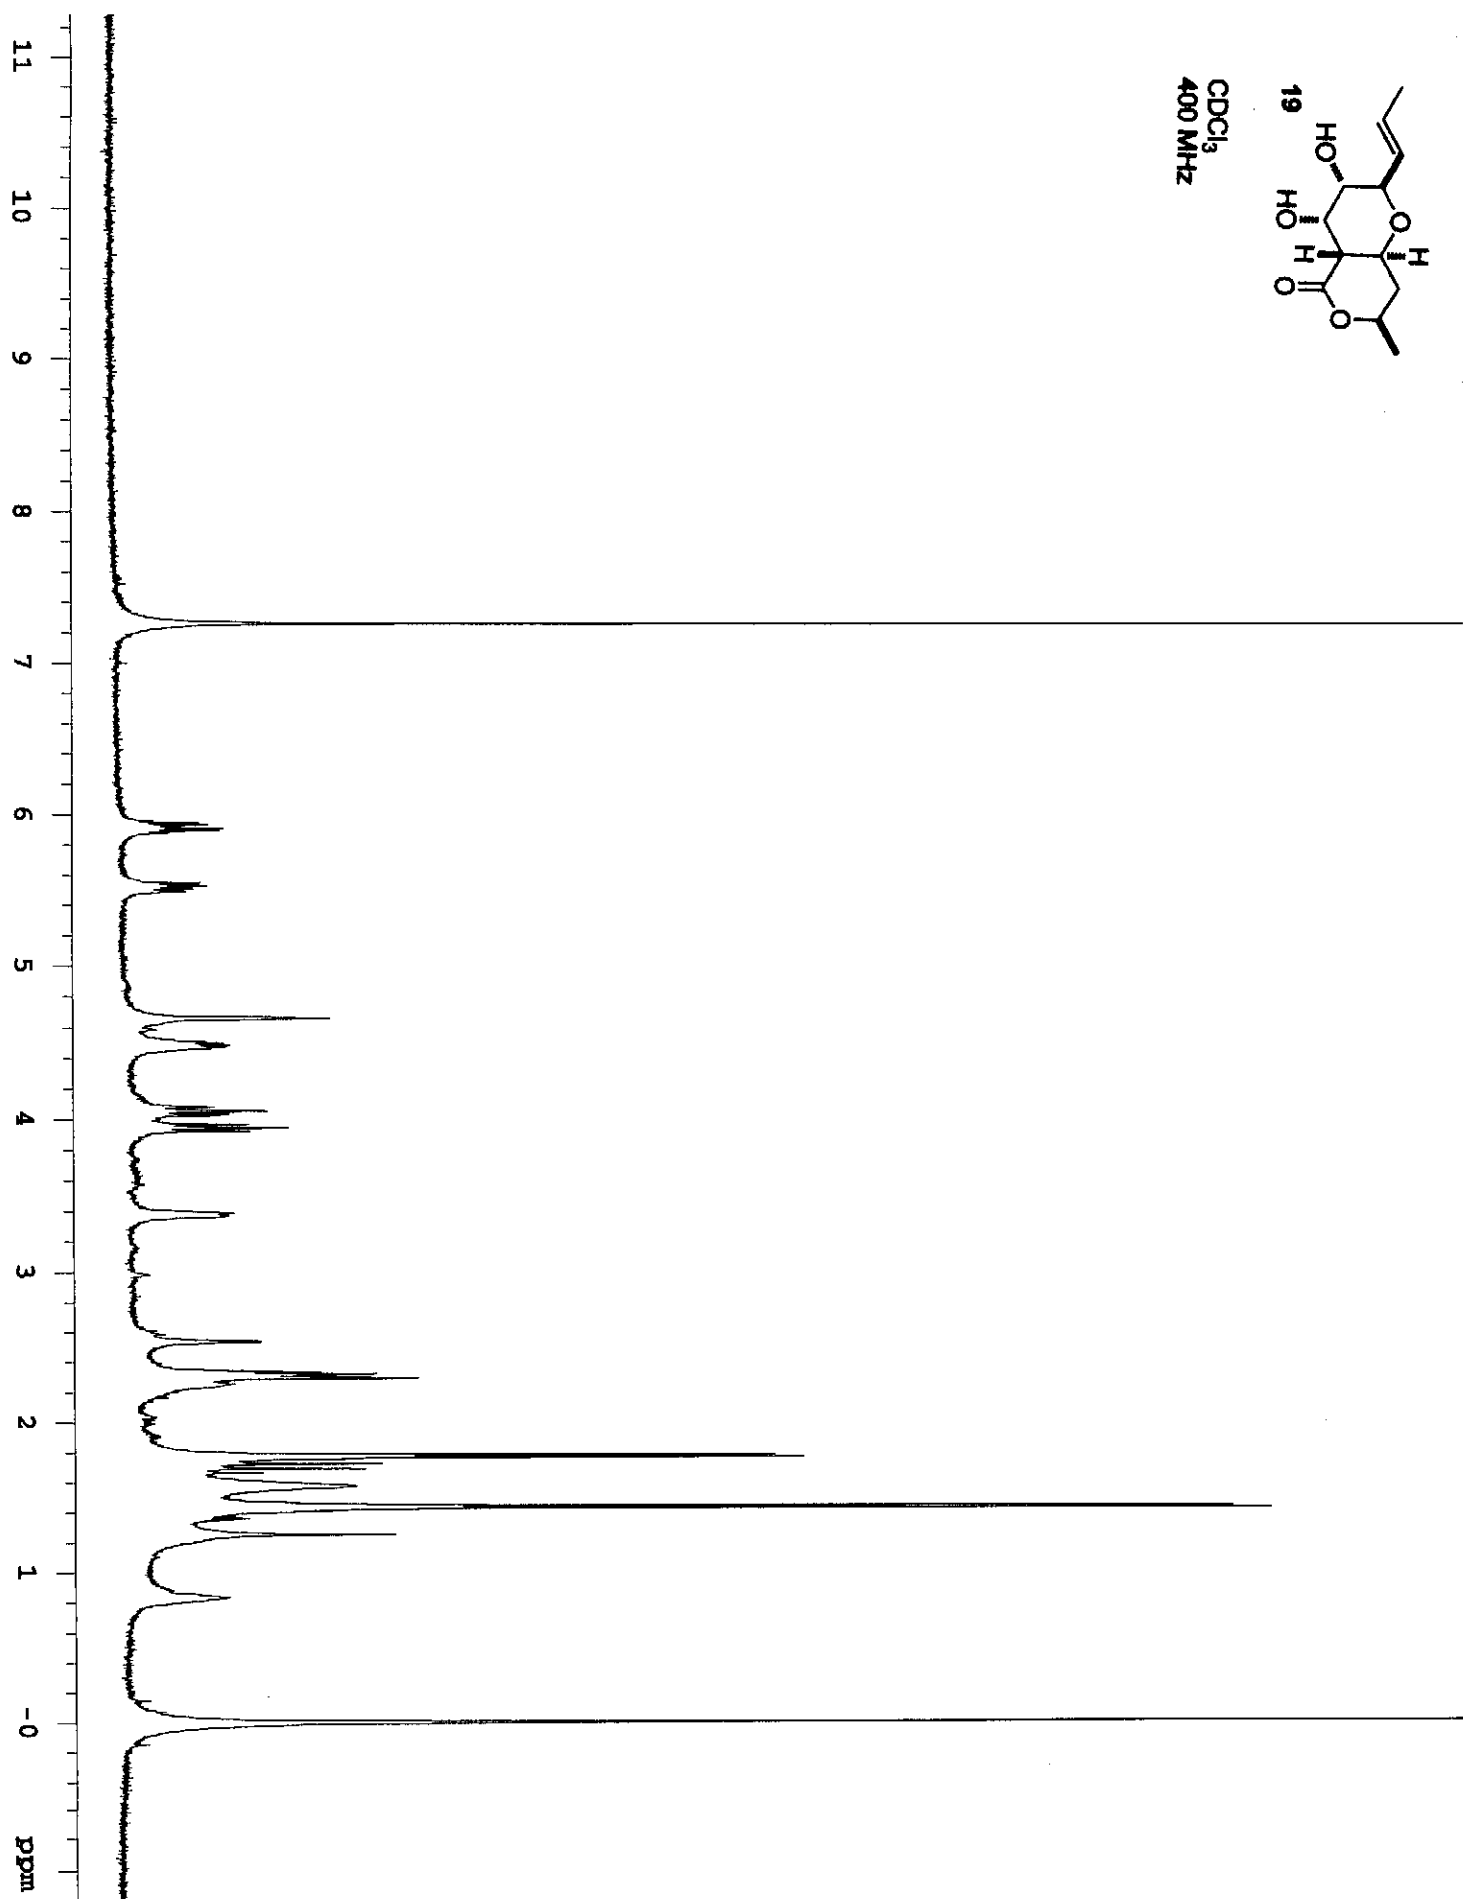

| INDEX | FREQUENCY | PPM     | HEIGHT |
|-------|-----------|---------|--------|
| 1     | 17099.020 | 170.095 | 28.4   |
| 2     | 13281.918 | 132.124 | 73.5   |
| 3     | 12880.599 | 128.132 | 80.1   |
| 4     | 7772.564  | 77.319  | 119.2  |
| 5     | 7755.779  | 77.152  | 102.2  |
| 6     | 7740.519  | 77.000  | 137.7  |
| 7     | 7708.475  | 76.681  | 131.1  |
| 8     | 7545.964  | 75.065  | 84.3   |
| 9     | 7172.875  | 71.353  | 80.5   |
| 10    | 6760.112  | 67.247  | 68.5   |
| 11    | 6589.209  | 65.547  | 92.6   |
| 12    | 5077.779  | 50.512  | 96.9   |
| 13    | 3731.150  | 37.116  | 80.3   |
| 14    | 2208.277  | 21.967  | 85.7   |
| 15    | 1819.166  | 18.096  | 72.1   |

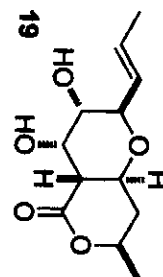

CDCl<sub>3</sub>  
100 MHz

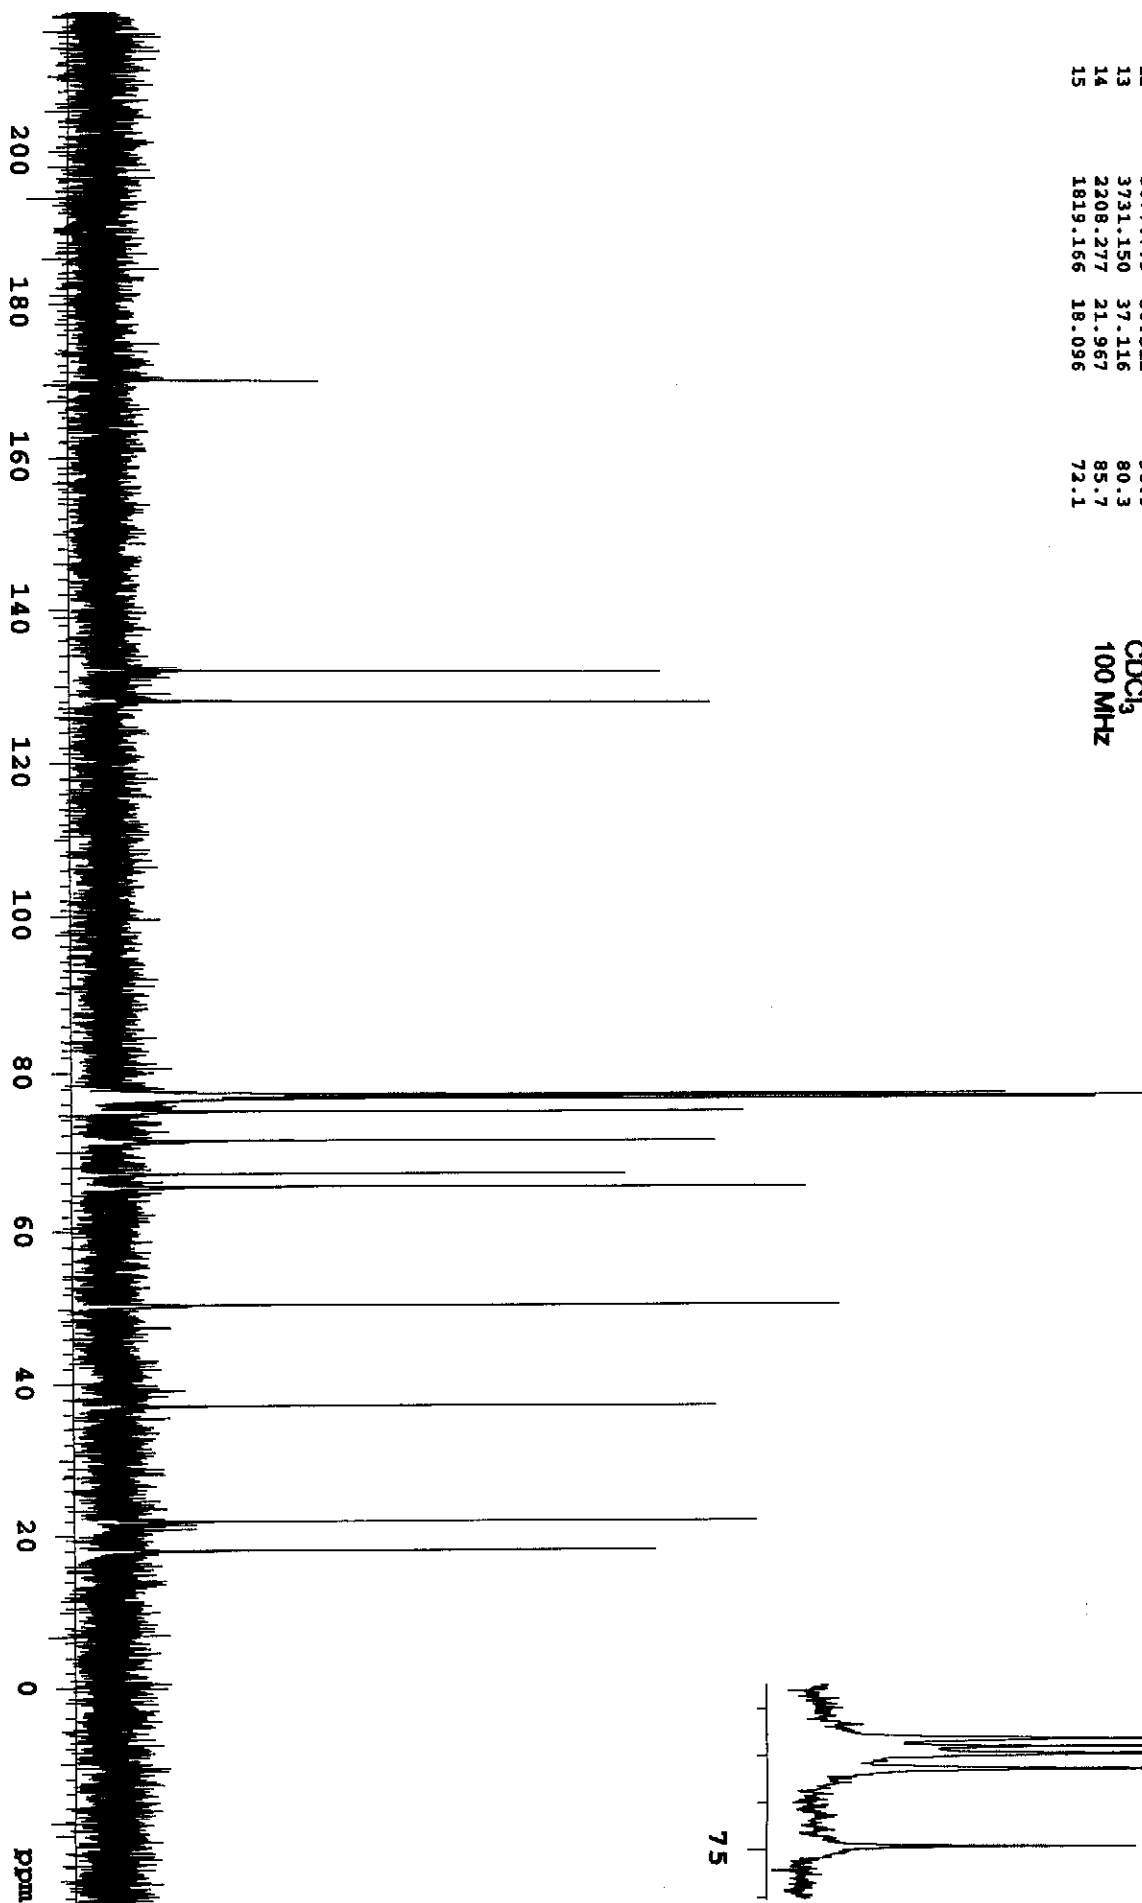

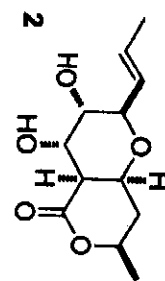

$\text{CDCl}_3$   
400 MHz

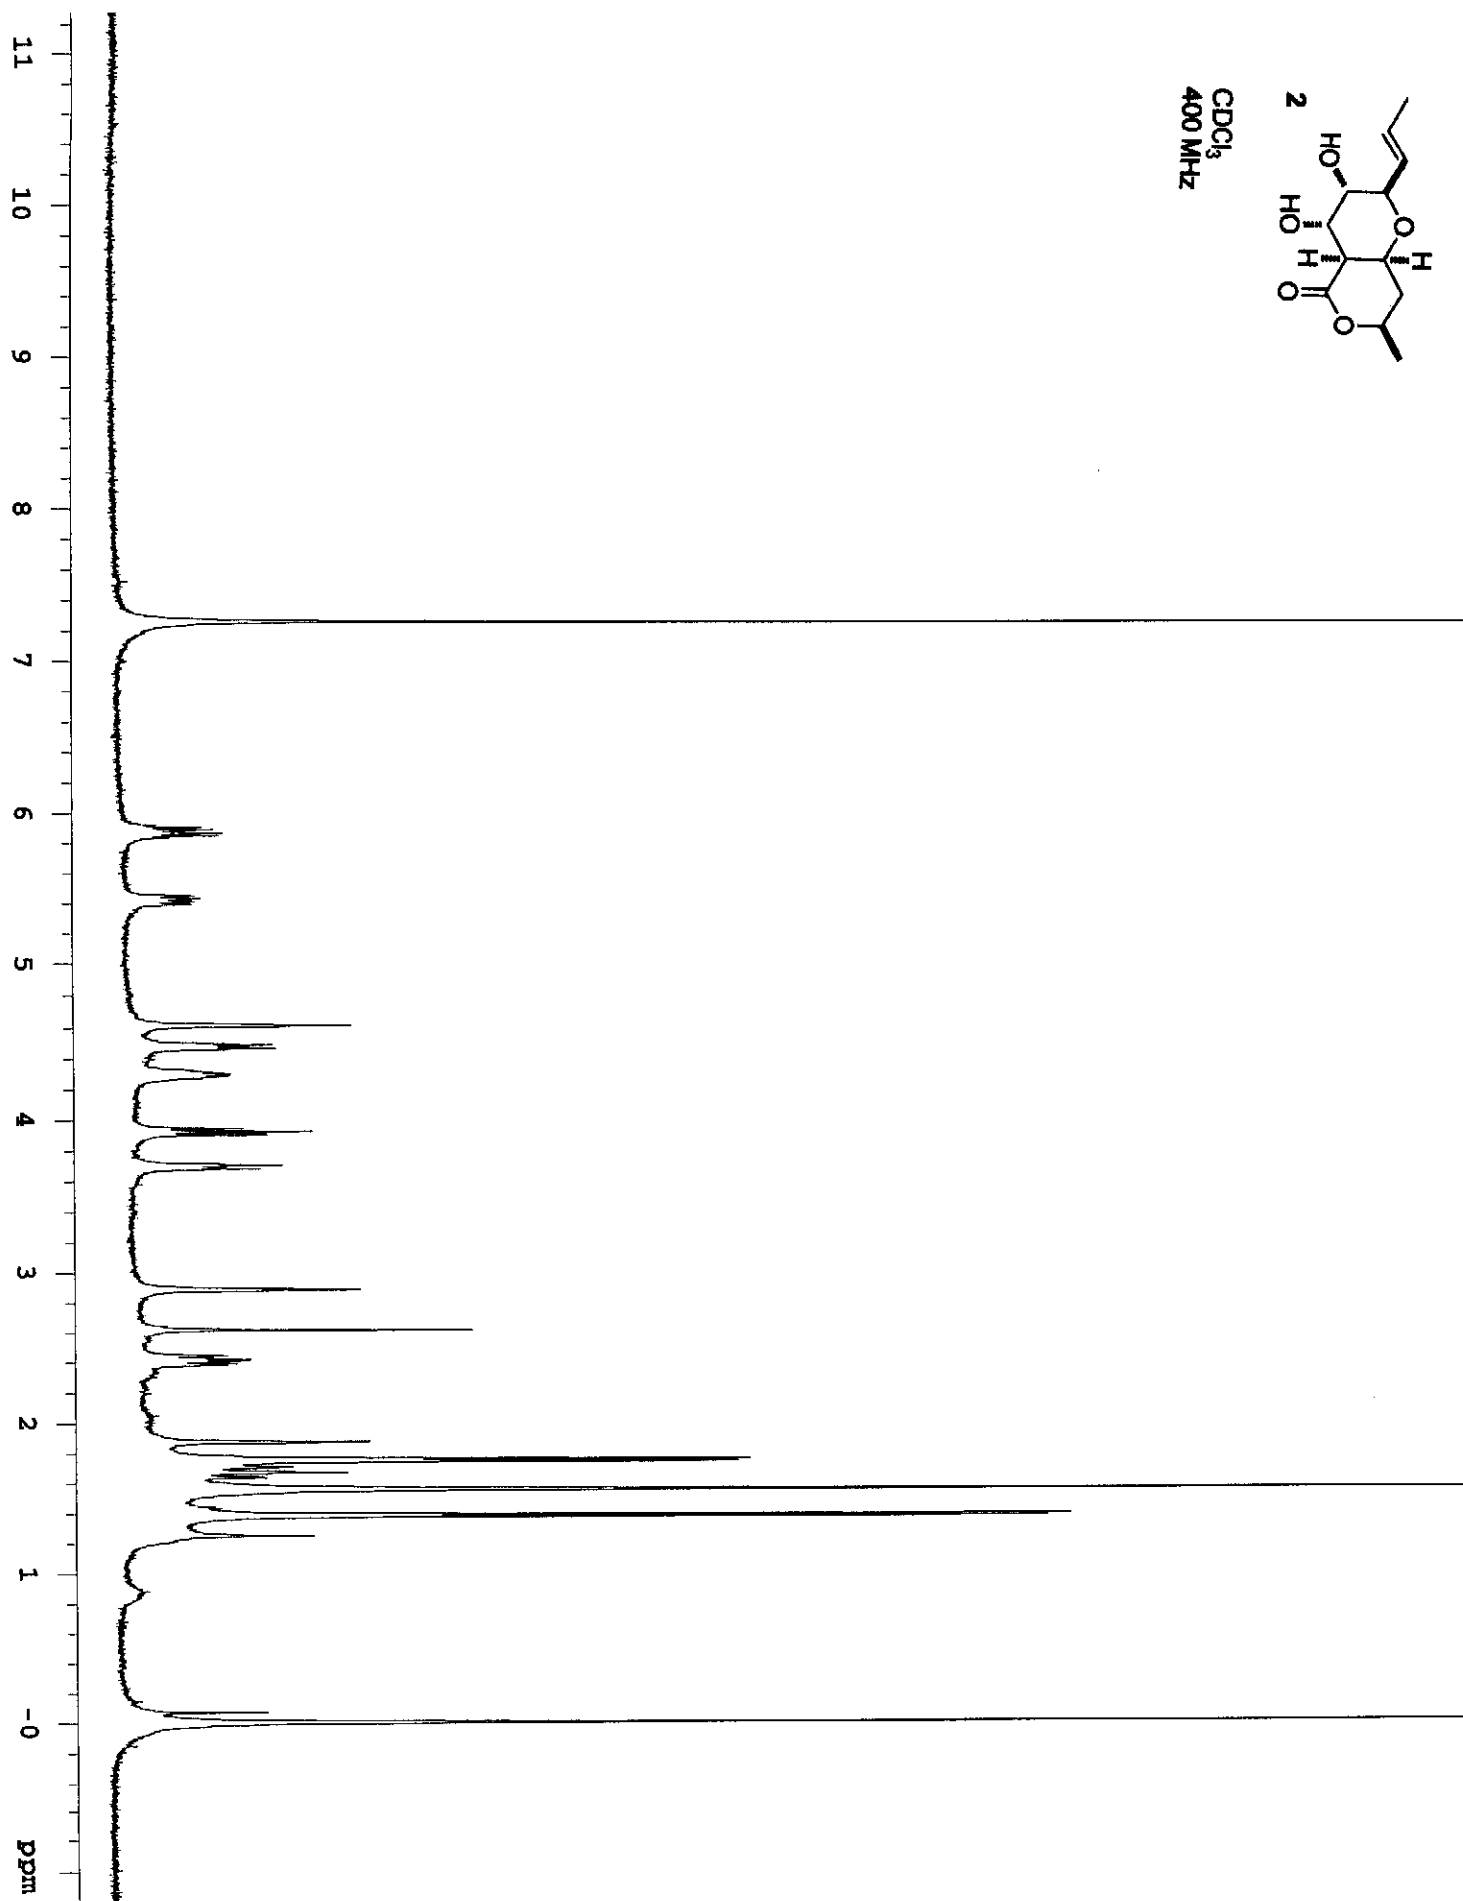

ar-9-122-4

Pulse Sequence: gCOSY

Solvent: CDCl<sub>3</sub>

Ambient temperature

File: ar-9-122-4-cosy

INOVA-400 "cosy"

Relax. delay 1.000 sec

Acq. time 0.205 sec

Width 5000.0 Hz

2D Width 5000.0 Hz

Single scan

256 increments

OBSERVE H1, 399.7858130 MHz

DATA PROCESSING

Sq. sine bell 0.102 sec

F1 DATA PROCESSING

Sq. sine bell 0.026 sec

FT size 2048 x 2048

Total time 0 min, -1 sec

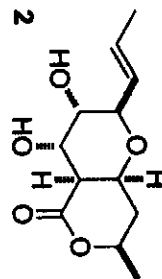CDCl<sub>3</sub>  
400 MHz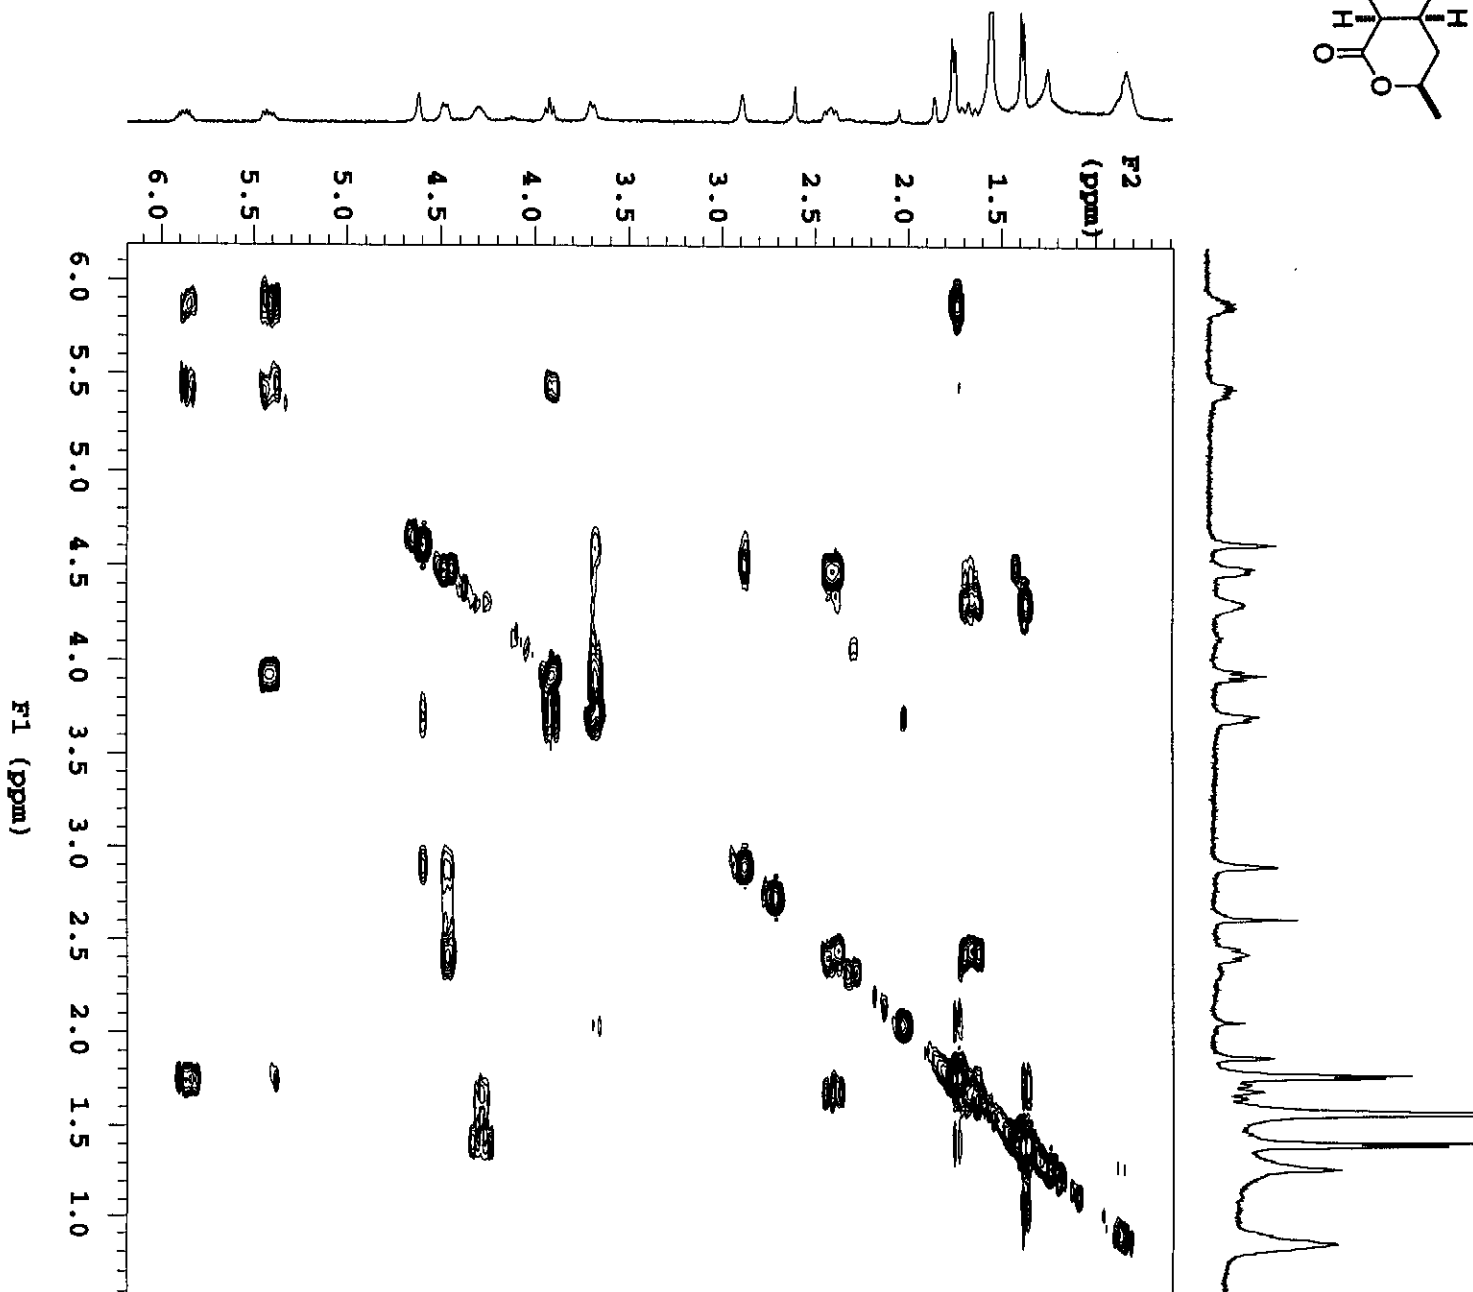

| INDEX | FREQUENCY | PPM     | HEIGHT |
|-------|-----------|---------|--------|
| 1     | 17205.072 | 171.150 | 18.4   |
| 2     | 13326.169 | 132.564 | 44.7   |
| 3     | 12885.177 | 128.177 | 50.7   |
| 4     | 7772.564  | 77.319  | 259.4  |
| 5     | 7758.830  | 77.182  | 81.7   |
| 6     | 7740.519  | 77.000  | 264.1  |
| 7     | 7708.475  | 76.681  | 259.0  |
| 8     | 7266.719  | 72.287  | 62.9   |
| 9     | 6832.594  | 67.968  | 69.7   |
| 10    | 6739.512  | 67.042  | 60.7   |
| 11    | 6640.327  | 66.056  | 74.8   |
| 12    | 4559.728  | 45.359  | 75.1   |
| 13    | 3687.661  | 36.684  | 71.8   |
| 14    | 2063.313  | 20.525  | 69.8   |
| 15    | 1813.825  | 18.043  | 44.7   |
| 16    | -2.790    | -0.028  | 19.0   |
| 17    | -1849.159 | -18.395 | -30.0  |

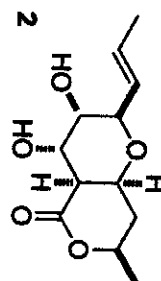

CDCl<sub>3</sub>  
100 MHz

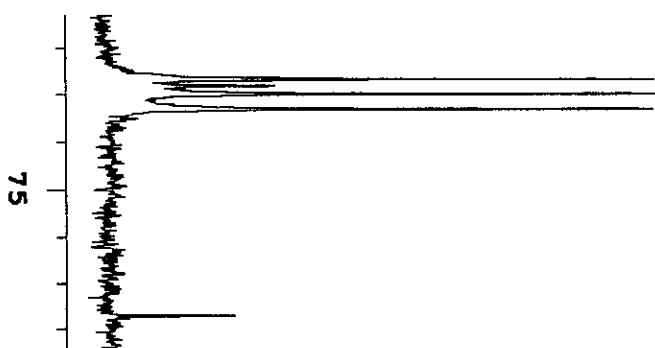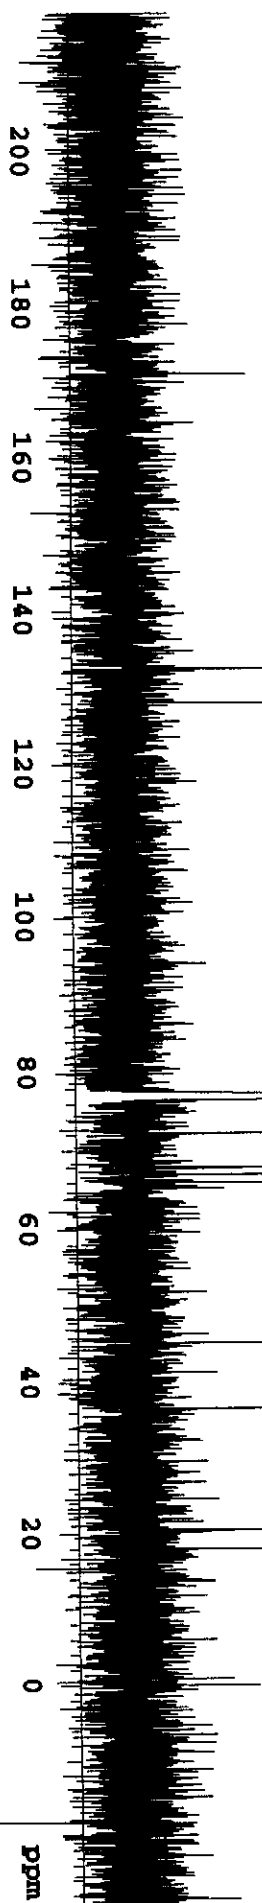



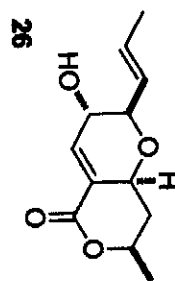

CDCl<sub>3</sub>  
400 MHz

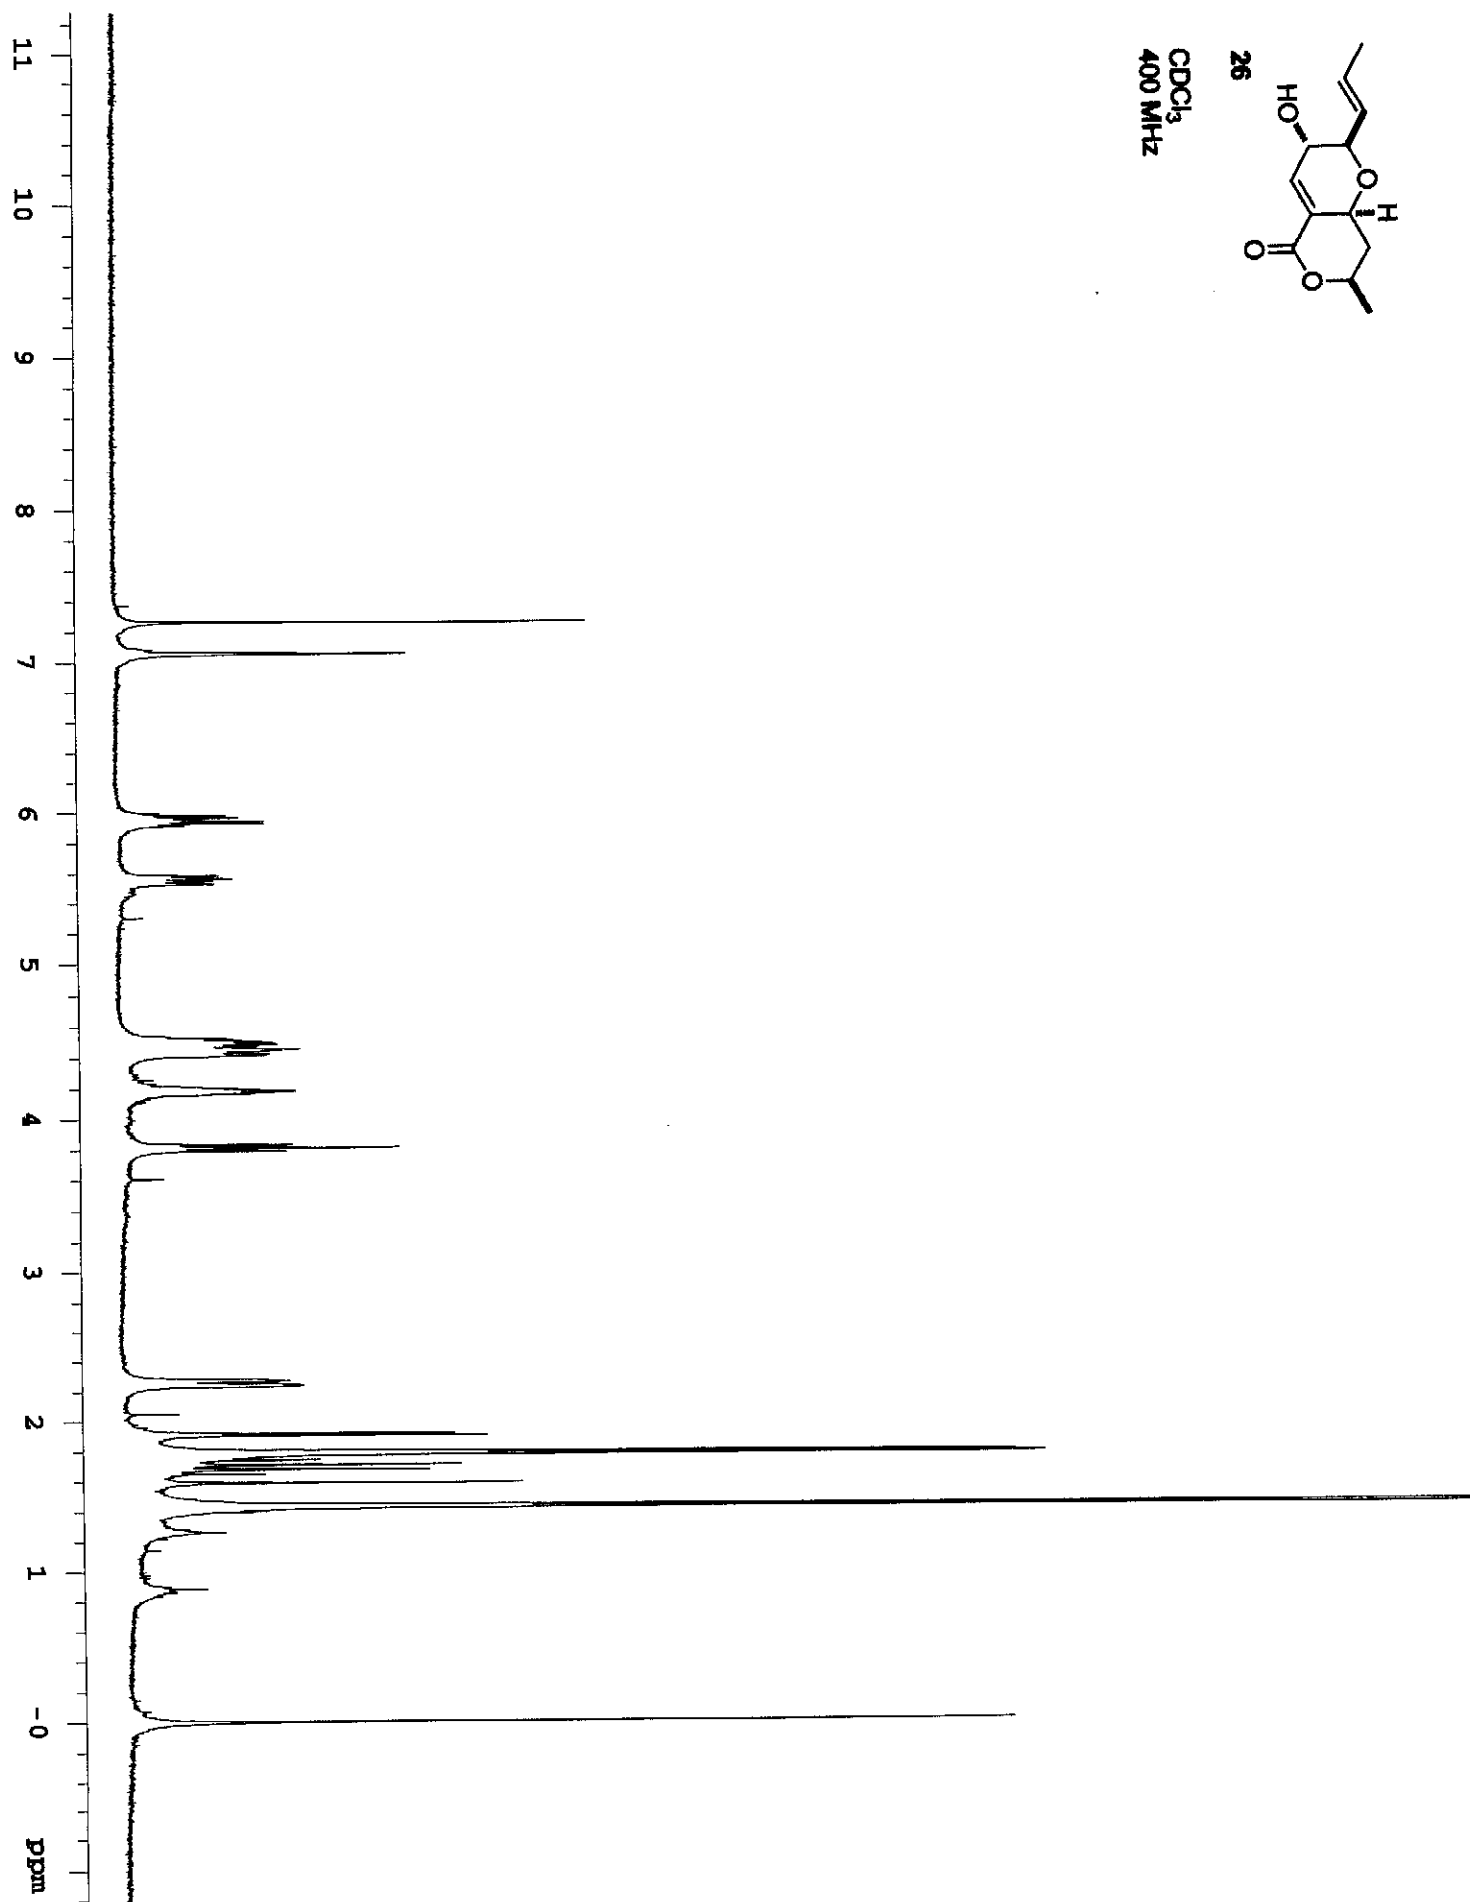

| INDEX | FREQUENCY | PPM     | HEIGHT |
|-------|-----------|---------|--------|
| 1     | 16437.266 | 163.512 | 13.4   |
| 2     | 14023.326 | 139.499 | 49.8   |
| 3     | 13291.667 | 132.221 | 45.1   |
| 4     | 13107.035 | 130.384 | 22.9   |
| 5     | 12839.244 | 127.720 | 43.3   |
| 6     | 8015.177  | 79.732  | 54.9   |
| 7     | 7772.563  | 77.319  | 192.5  |
| 8     | 7740.519  | 77.000  | 200.0  |
| 9     | 7708.476  | 76.681  | 195.2  |
| 10    | 7362.864  | 73.243  | 55.2   |
| 11    | 7154.582  | 71.171  | 50.1   |
| 12    | 6820.414  | 67.847  | 60.4   |
| 13    | 3727.458  | 37.079  | 61.9   |
| 14    | 2187.083  | 21.756  | 68.9   |
| 15    | 1817.820  | 18.083  | 49.8   |
| 16    | -1.790    | -0.018  | 10.6   |

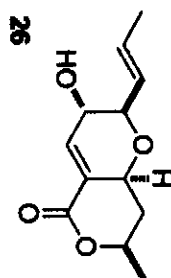

CDCl<sub>3</sub>  
100 MHz

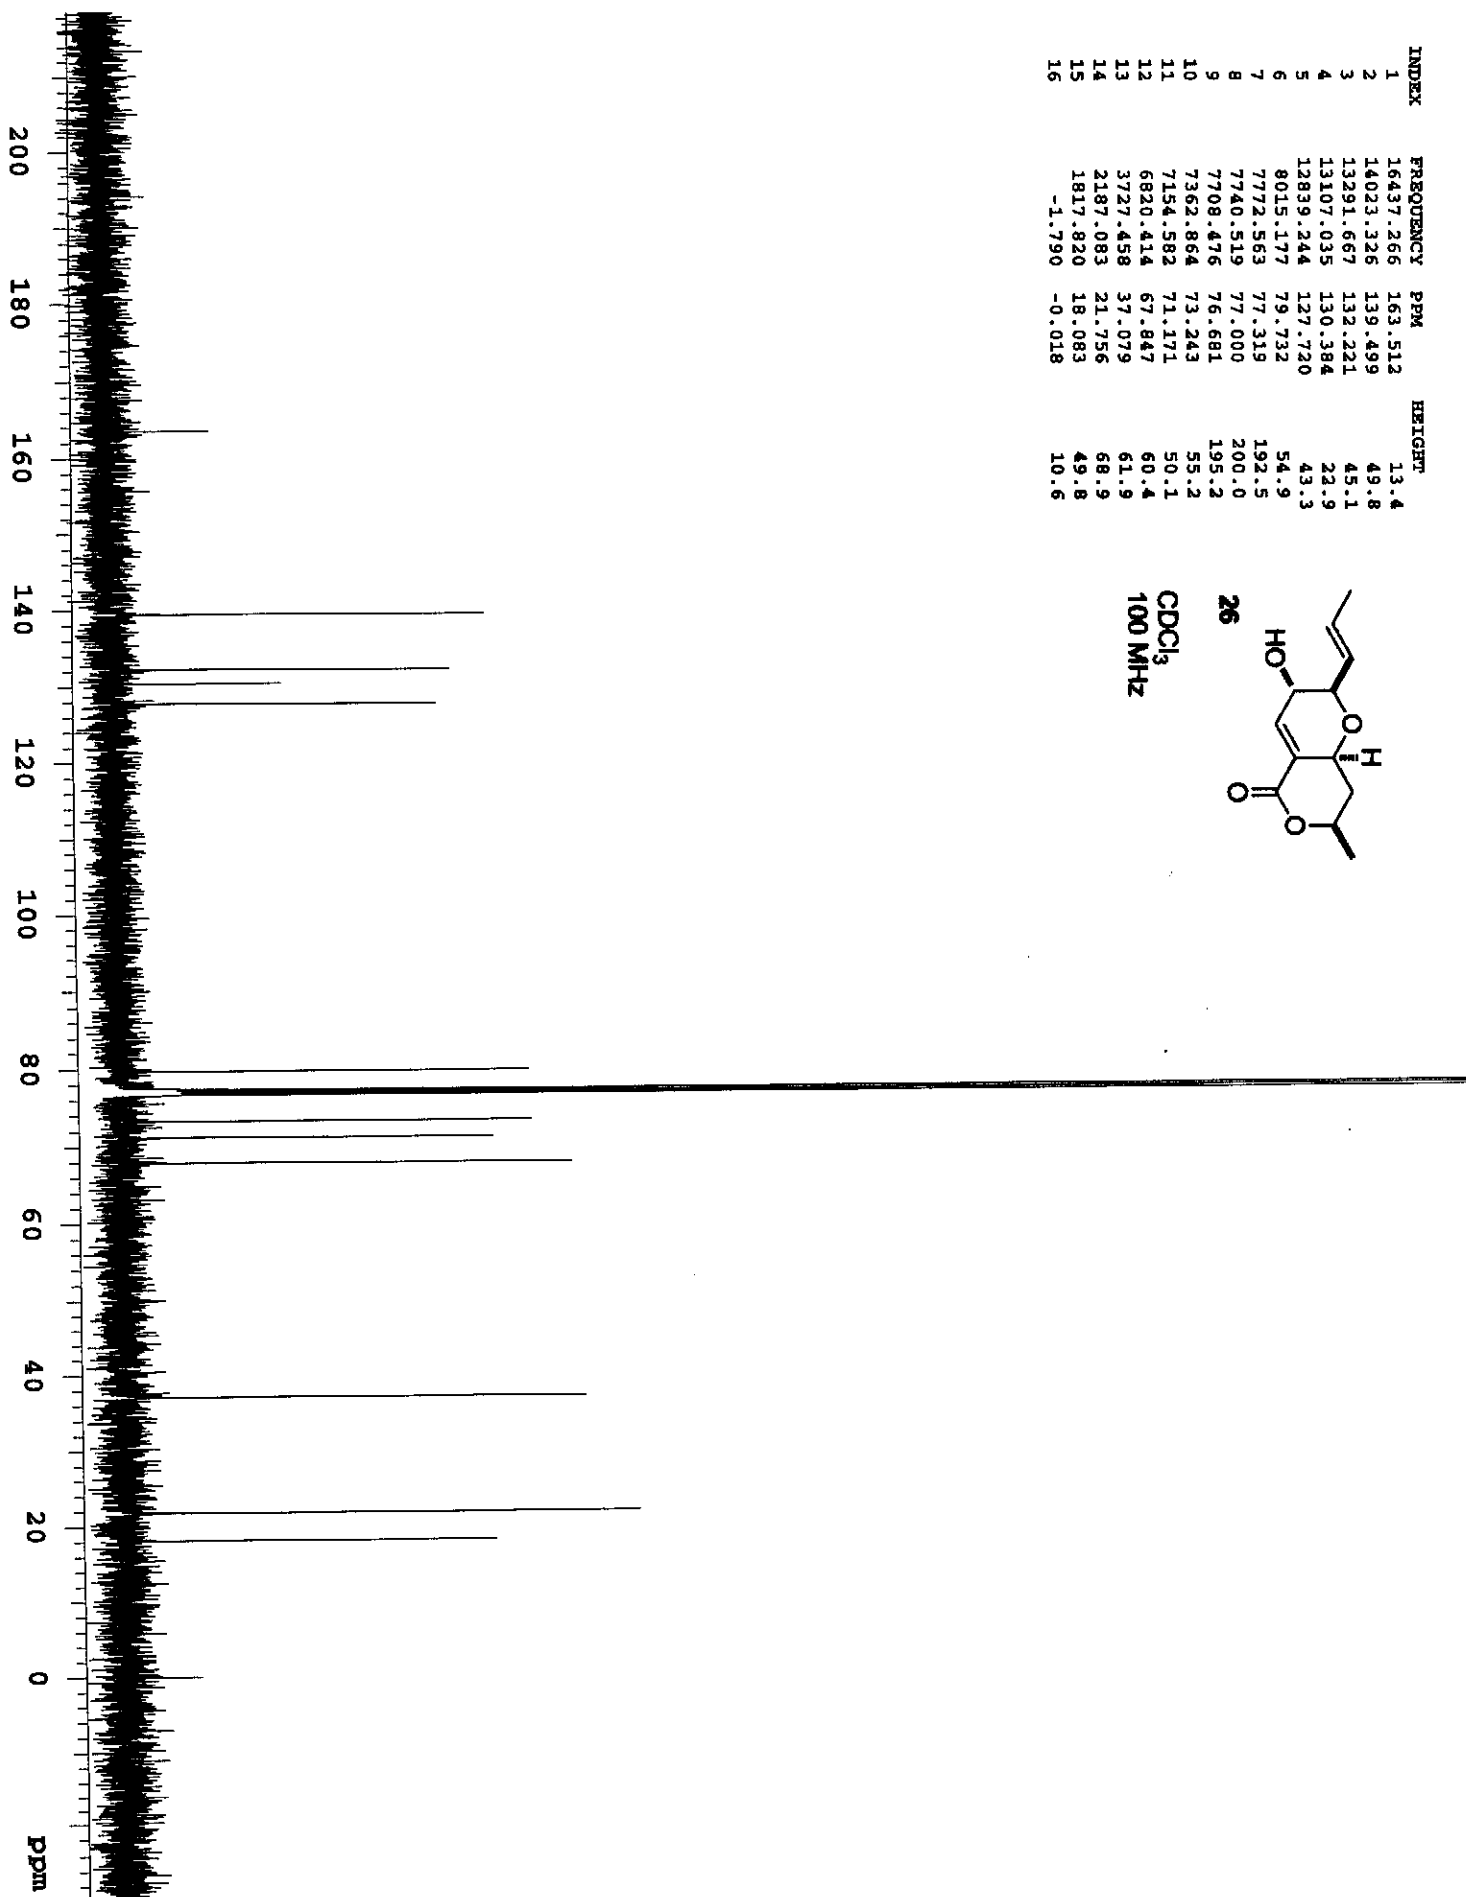

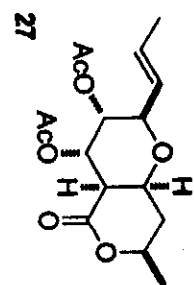

CDCl<sub>3</sub>  
400 MHz

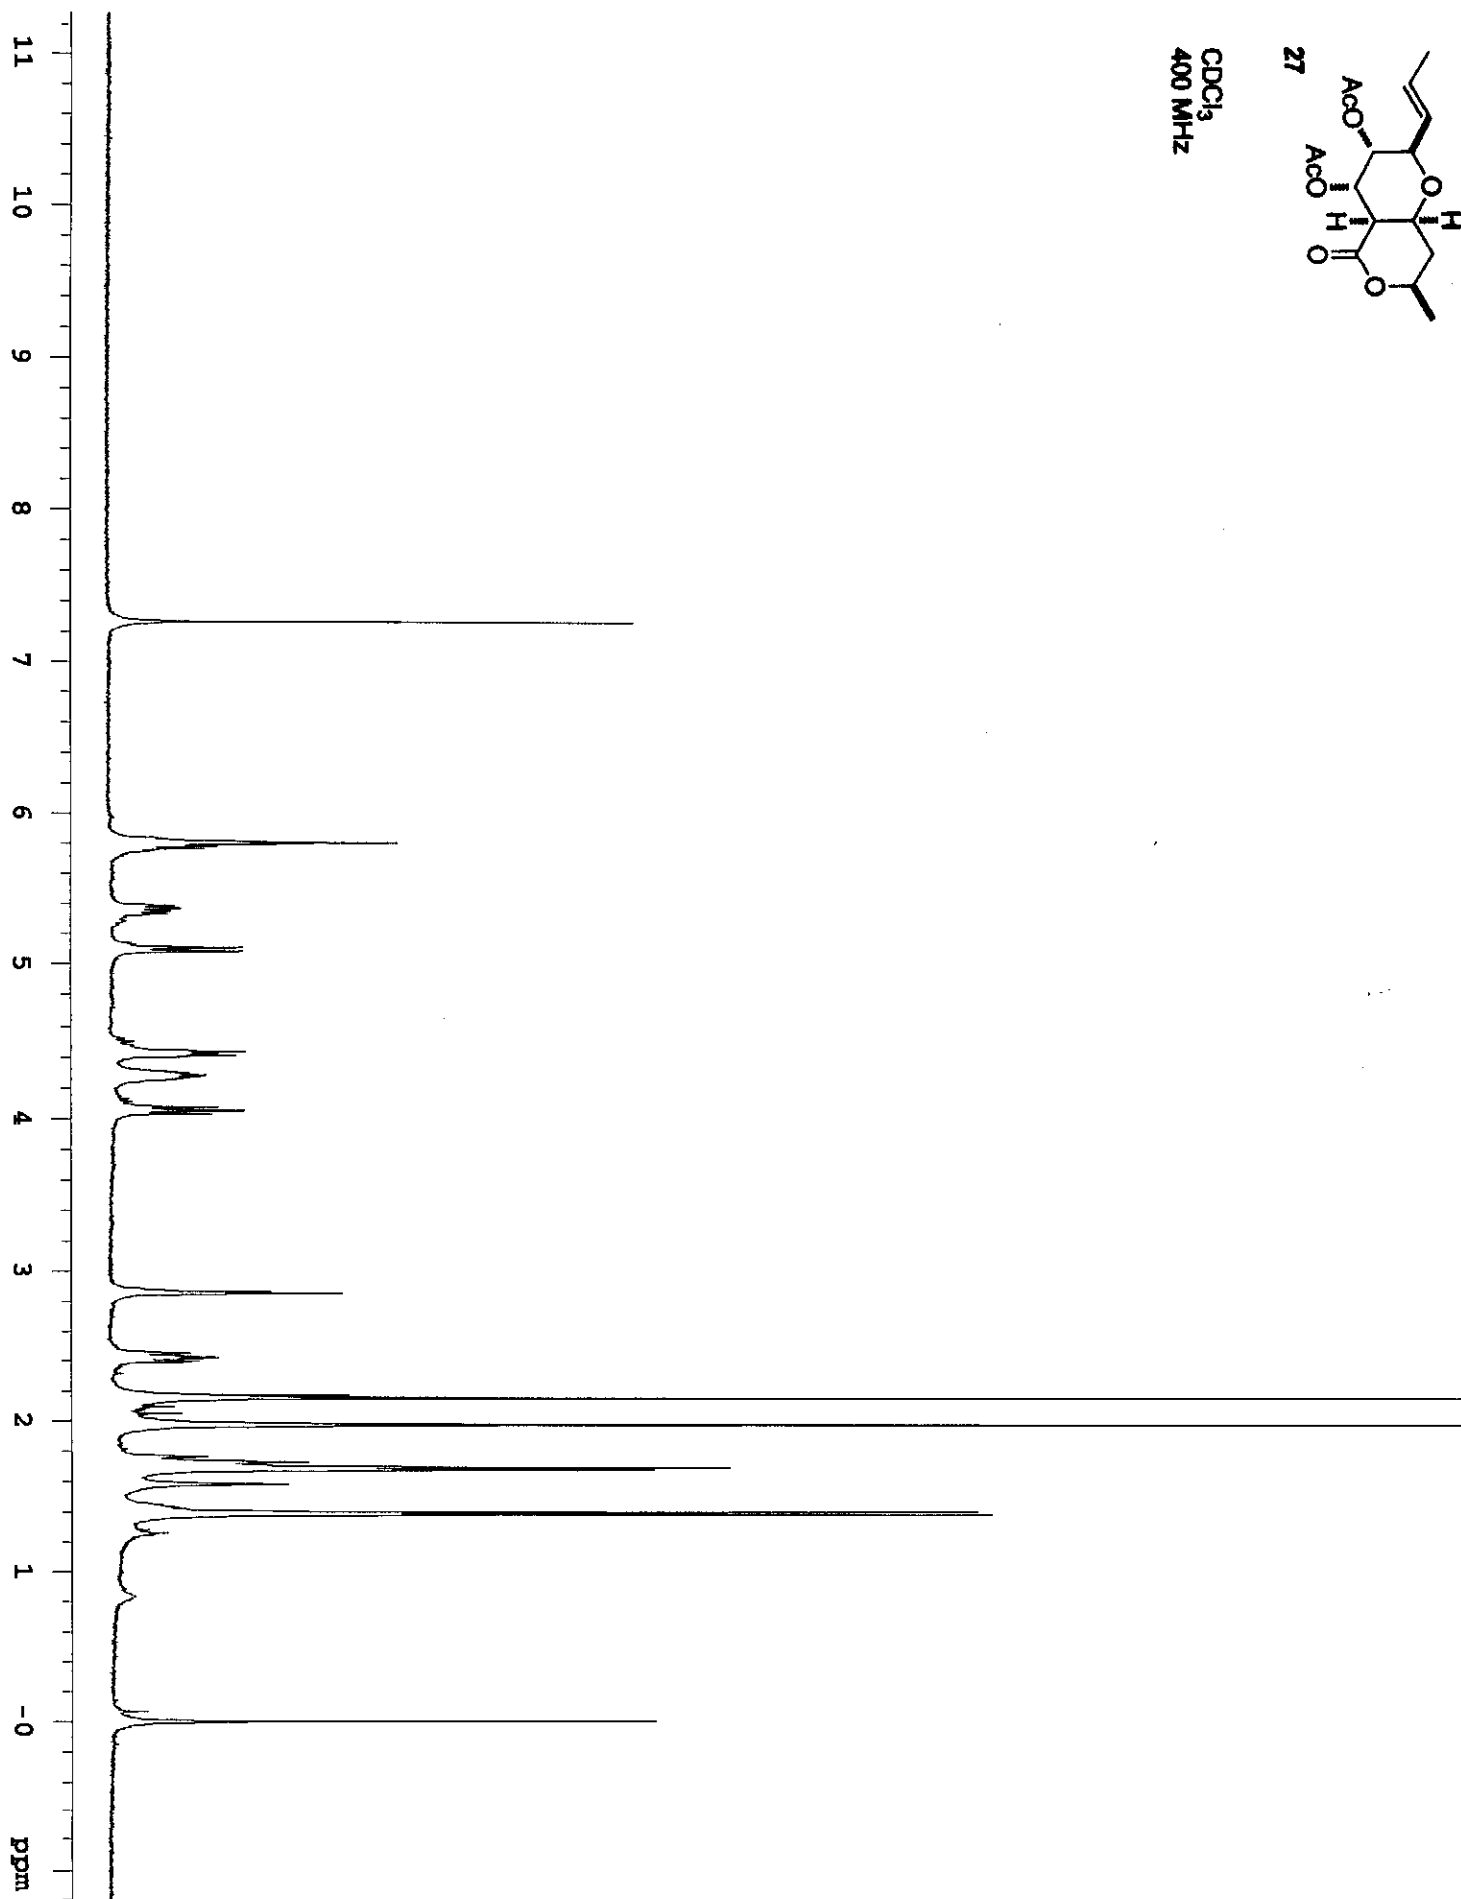

| INDEX | FREQUENCY | PPM     | HEIGHT |
|-------|-----------|---------|--------|
| 1     | 17053.242 | 169.640 | 14.1   |
| 2     | 17012.805 | 169.237 | 23.4   |
| 3     | 16995.112 | 169.061 | 15.7   |
| 4     | 13246.058 | 131.767 | 40.2   |
| 5     | 12792.096 | 127.251 | 41.6   |
| 6     | 7772.564  | 77.319  | 424.3  |
| 7     | 7740.519  | 77.000  | 443.0  |
| 8     | 7708.475  | 76.681  | 442.0  |
| 9     | 7635.993  | 75.960  | 46.5   |
| 10    | 7257.564  | 72.196  | 53.4   |
| 11    | 6816.571  | 67.809  | 55.5   |
| 12    | 6800.549  | 67.650  | 47.2   |
| 13    | 6764.690  | 67.293  | -15.0  |
| 14    | 6728.831  | 66.936  | 58.9   |
| 15    | 4476.565  | 44.531  | 62.0   |
| 16    | 3686.135  | 36.668  | 52.1   |
| 17    | 2109.854  | 20.988  | 45.6   |
| 18    | 2083.151  | 20.722  | 39.7   |
| 19    | 2060.262  | 20.495  | 61.8   |
| 20    | 1800.091  | 17.907  | 45.6   |

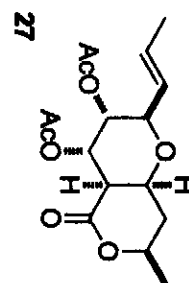

CDCl<sub>3</sub>  
100 MHz

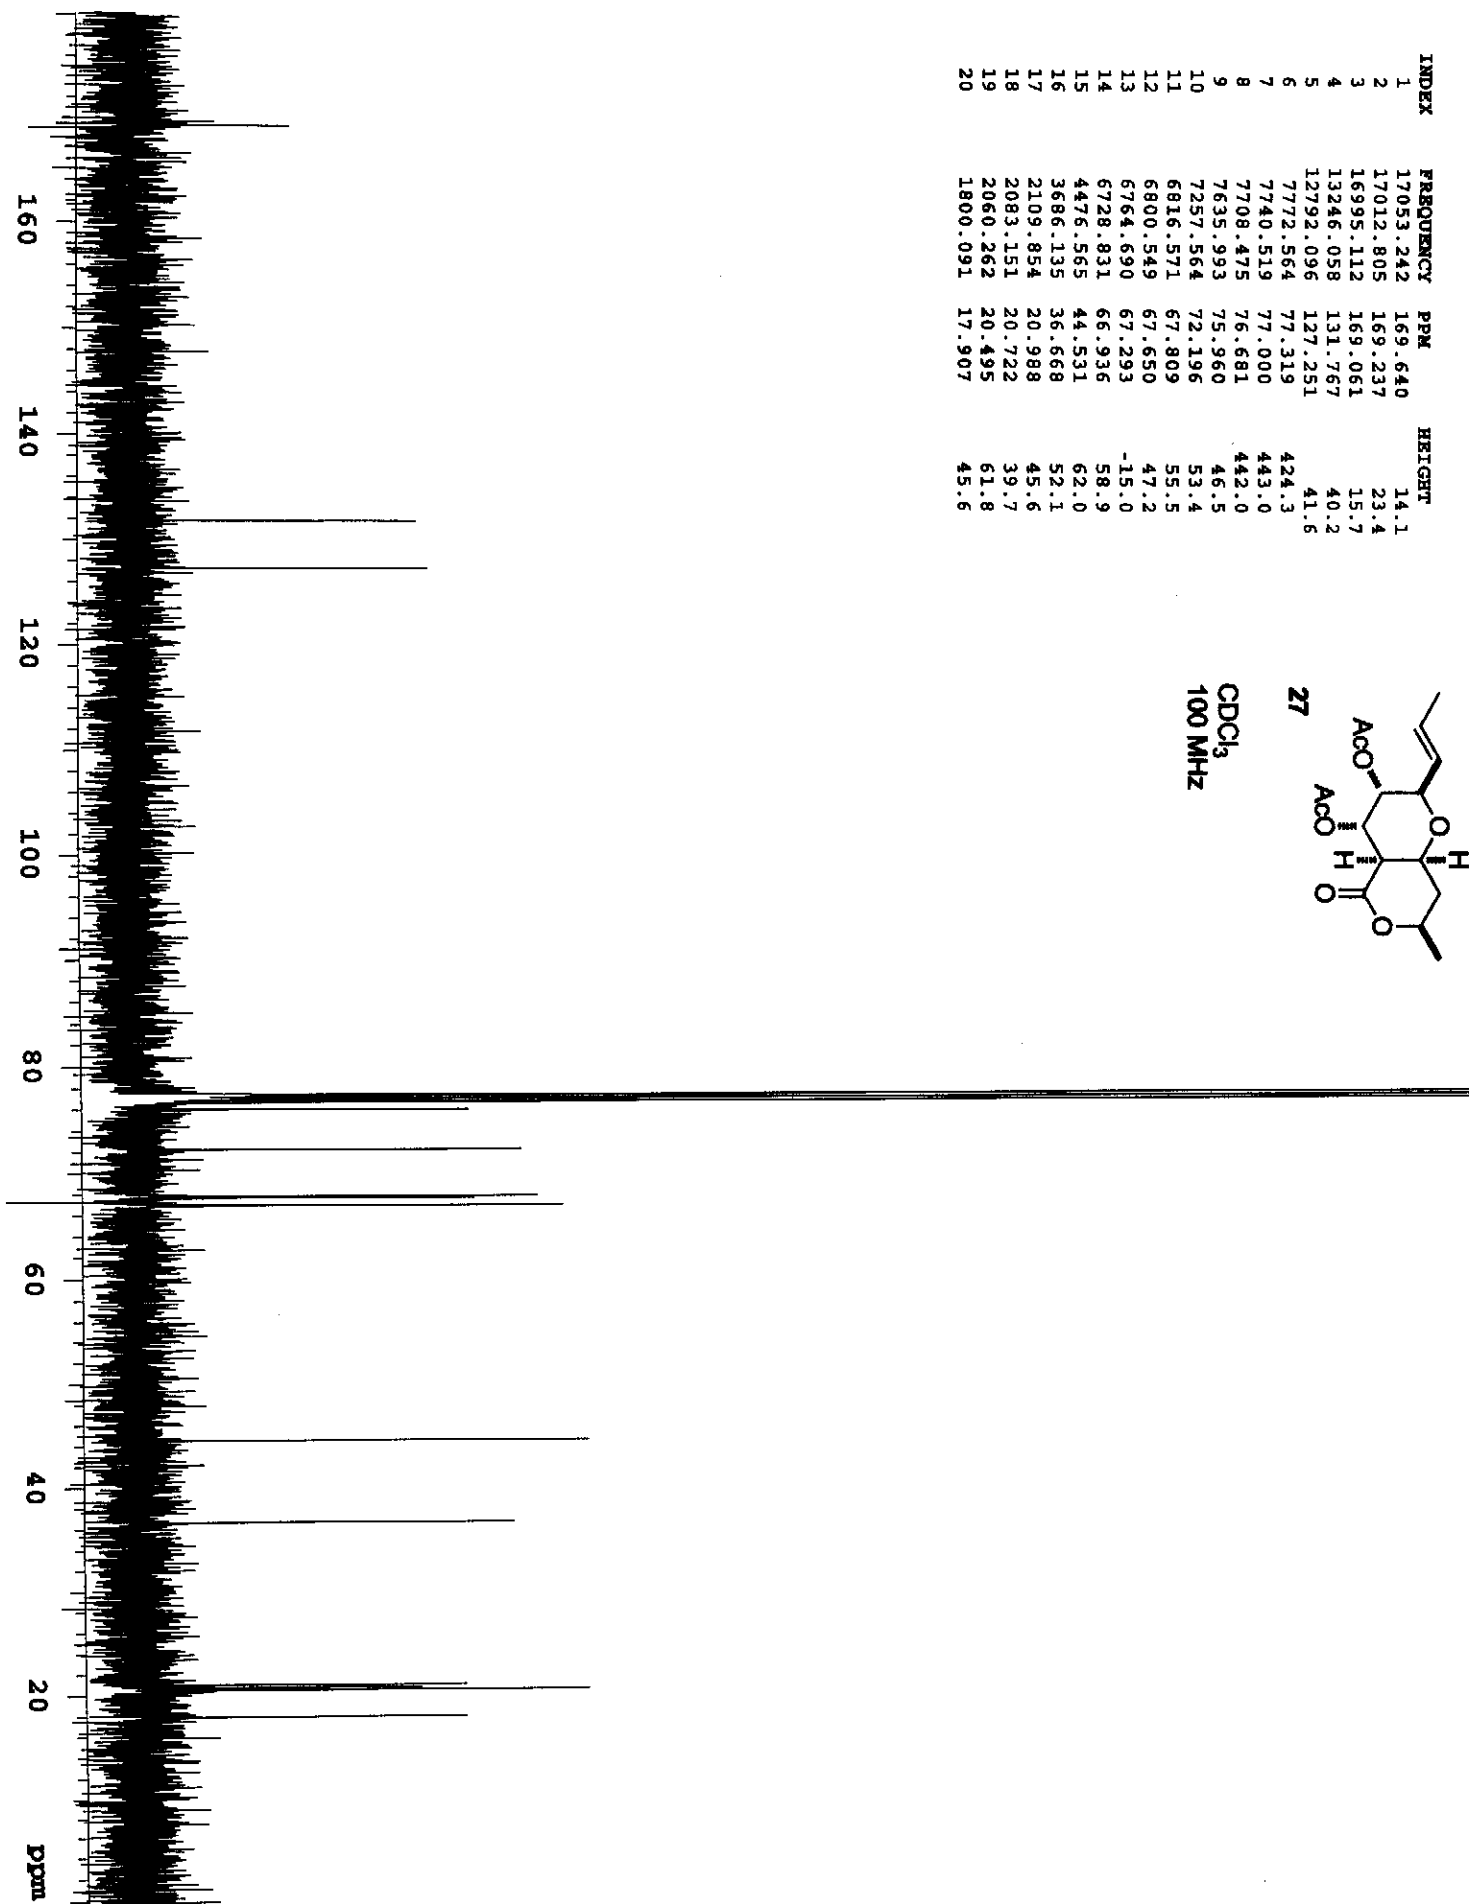

Supplement: Supplementary file 1 [file 4412332]
